# Supplementary material
Source: Research Square preprint supplement (doi:10.21203/rs.3.rs-8747903/v1)
Supplement: Supplementary file 1 [file 0dcfea679236b967537cc334.xlsx]

## Sheet: Table S1
Table S1 Nutrient levels of the basal diet (DM basis) %
Ingredients 1	Content	Nutrient levels 2	Content
Corn	28.1	Crude Ash	4.61
Soybean meal	5	Neutral Detergent Fiber	35.65
Cotton meal	3.7	Acid Detergent Fiber	19.22
soya bean skin	3.2	Crude Protein	10.49
Nacl	0.42	Ether Extract	1.84
NaHCO3	0.43	Ca	0.54
Premix1	2.15	P	0.35
Dry straw	13	Total net energy mf/（MJ/kg）	5.49
Whole corn silage	44
Total	100
Note:1.One kilogram of the premix contained the following: VA 500 000 IU，VD 150 000 IU，VE 2 400 IU，Fe 500 mg，Cu 1 000 mg，Zn 2 400 mg，Mn 1 500 mg，Se 45 mg，Co 15 mg. 2.NEmf was calculated according to Feeding Standard of Beef Cattle ( NY /T 815—2004) ，while the others were measured values．

## Sheet: Table S2
Table S2 Primer design
Gene	Name	Primer
CCND1	CCND1-F	CGTTTGGTCCTGGTGAACAAAC
	CCND1-R	GCAAATGAACTTCACGTCTGTG
CREB3L1	CREB3L1-F	GGAGAATGCCAACAGGACTCT
	CREB3L1-R	TCCCTCGTCGTAGAACAGGA
FOXO1	FOXO1-F	CGAGCAAGCAGGCTACACT
	FOXO1-R	CTGCAAACACTGGGCAAACA
PFKFB3	PFKFB3-F	CGCAATAGTGTCACCCCACT
	PFKFB3-R	TCCCTAGCAAAGGTTGTCCG
PRKAG3	PRKAG3-F	ACAACAGAACGAGACAGCCTCCCCT
	PRKAG3-R	TCGAAGATGACCAGCTTGGA
SCD5	SCD5-F	CTCTGCTCTGGGCCTACTT
	SCD5-R	CTGTGGCTCCACAAACGATG
TBC1D1	TBC1D1-F	TAACACCAGCAAAGAGCCGT
	TBC1D1-R	TGGCTCTCTGAGTCACTGGA
FABP3	FABP3-F	GACAGGAAAGTCAAGTCCATCG
	FABP3-R	TCAACCATCTCCCGCACAAG
LPL	LPL-F	GCCGCAGACAGGATTACAGG
	LPL-R	CCAGGAATGAGGTGGCAAGT
SLC27A6	SLC27A6-F	GTTGGTGCTATCATTGGG
	SLC27A6-R	CGAGCGTAAGCTGGTAAA
COL8A1	COL8A1-F	CTGAAGAGACGGAGACCAGC
	COL8A2-R	GGTGGTCCAGCCATCACATTT
ELN	ELN-F	TGGGAAAGTGCCAGGTGTG
	ELN-R	TGTAGGGCAGTCCATAGCCA
PRSS2	PRSS2-F	CTGAGCCACGCCGACTGT
	PRSS2-R	TTCTGGGCACAGCCGTAG
SLC7A8	SLC7A8-F	AACCCAACATCGGCCTCATC
	SLC7A8-R	ACCAGGGTCAGCAACTCAAT
ADCY1	ADCY1-F	GAGGATGACGACAAGCGGAG
	ADCY1-R	AATGAGAGCCAGAACCACGG
ADCY7	ADCY7-F	GGGAAGCAGCAGTGACCTG
	ADCY7-R	AAACAATCCGCCTTTGGACC
FGF10	FGF10-F	GTGTCTTCCGTCCCTGTCAC
	FGF10-R	ATCTCCAGGATACTGTACGGG
ITGA2B	ITGA2B-F	CTGGGCCTTGAACCTGGATT
	ITGA2B-R	TCGTGTTTCATCATAGAGGTCG
ITGB2	ITGB2-F	AGGGCATCCAGGGGACAT
	ITGB2-R	GCAGGTGCTGACCTTGTAGT
PRKCB	PRKCB-F	GAGCGAGGGAGAGGAGAGC
	PRKCB-R	ACAAAACAGCAGACTTGGCAC
PRKCG	PRKCG-F	TAGTCGCCCTTCCACCTGTT
	PRKCG-R	CCACAAAACTGCAGACTTGACAT
RASGRP3	RASGRP3-F	AGCCCTGAGACTTTAGGACAGA
	RASGRP3-R	TCAGCTCTCCATTGTCATCAAACAT
RGS14	RGS14-F	GCAATGAGCAGGCCCTAGT
	RGS14-R	AGTTTCTCCAGATCCAGCGG
LGR6	LGR6-F	CAACCTCATCTCCCTGGTCC
	LGR6-R	GCAGTTCAGGTCTAGCACCAC
NOTUM	NOTUM-F	CTGGTACTGCTTCAACCGGG
	NOTUM-R	AGCAGTAGGGGATGAAGACCAT
RNF43	RNF43-F	GCAGCGGTGGAGTCTGAAAG
	RNF43-R	CAGGTATAGGGGGTGAGACTGC
SFRP4	SFRP4-F	GACCGGTGCAAGTGCAAAAA
	SFRP4-R	AAGAAGCATCATCCGTGAGCG
Wnt-4	Wnt-4-F	CGAGCAACTGGCTGTACCT
	Wnt-4-R	CACACCTGCCGAAGAGATGG
β-actin	β-actin	GCACCACACCTTCTACAACGAGC
	β-actin	CAGAGGCATACAGGGACAGCAC
PPARγ	PPARγ -F	CAGGAGATCACAGAGTACGCCAAG
	PPARγ -R	GGGCTCCATAAAGTCACCAAAGGG
FABP4	FABP4-F	TGAGATTTCCTTCAAATTGGG
	FABP4-R	TGAGATTTCCTTCAAATTGGG
CEBP/α	CEBP/α-F	GGCATCTGCGAACACGAGACG
	CEBP/α-R	GTAGTCAAAGTCGTTGCCGCCTC
CREB3L1	CREB3L1	GGAGAATGCCAACAGGACTCT
	CREB3L1	TCCCTCGTCGTAGAACAGGA
SREBP1	SREBP1-F	CGACACCACCAGCATCAACCACG
	SREBP1-R	GCAGCCCATTCATCAGCCAGACC
ATGL	ATGL-F	GGAGCTTATCCAGGCCAATGT
	ATGL-R	TCATAGAGCGGCAGGTTGTC
HSL	HSL-F	CGGGACCGCGGAAAATTGAT
	HSL-R	GCGCCTTTGACTTTTGGACC

## Sheet: Table S3 
Table S3 The analysis of flavor substances in the longissimus dorsi muscle of different beef cattle breeds (ug/kg)
Group	Compound name	CAS	ChineseSimmental	TaihangCattle	Charolais	SEM	P-value
Alcohol	C2H6S	27607	4.6	4.16	4.73	0.25	0.669
	C4H10O	71-36-3	0.86	1.56	0.83	0.31	0.617
	C5H12O	123-51-3	4.39	10.09	13.34	1.9	0.145
	C10H18O	470-82-6	0.13	0.41	0.29	0.08	0.462
	C5H12O	71-41-0	46.64	17.27	13.94	8.74	0.27
	C6H14O	111-27-3	32.4	14.03	11.41	5.67	0.289
	C8H16O	53907-72-5	107.26	52.3	40.15	18.29	0.317
	C9H18O	31502-19-9	0.22	0.07	0.11	0.05	0.494
	C10H18O	98-55-5	1.44	0.97	0.89	0.15	0.296
	C8H10O	98-85-1	0.28	0.29	0.26	0.04	0.982
	C8H10O	22258	6.44	0.5	0.6	1.89	0.388
	C12H26O	112-53-8	1.95	1.41	1.44	0.27	0.71
	C8H10O2	122-99-6	2.23	2.54	1.58	0.42	0.69
	C7H8O	100-51-6	8.41	5.62	7.47	0.78	0.377
	C8H16O	20125-84-2	10.5	4.89	4.23	1.77	0.322
Aldehydes	C5H10O	96-17-3	3.05a	2.24ab	1.94b	0.22	0.08
	C5H10O	590-86-3	11.06a	7.10b	6.43b	0.82	0.01
	C5H10O	110-62-3	49.37	29.68	27.46	6.53	0.366
	C5H8O	1576-87-0	2.34	0.9	0.65	0.45	0.274
	C8H18O2	1599-47-9	0.36	0.48	0.31	0.11	0.839
	C7H14O	111-71-7	87.92	39.08	29.1	23.1	0.604
	C5H8O	107-86-8	8.93a	5.08b	4.20b	0.82	0.011
	C6H10O	6728-26-3	1.27	0.54	0.73	0.21	0.404
	C8H16O	124-13-0	52.89	30.59	32.01	12.8	0.78
	C7H12O	18829-55-5	7.97	3.52	3.93	1.26	0.32
	C9H18O	124-19-6	125.99	89.5	80.98	29.79	0.847
	C8H14O	2363-89-5	10.84	4.7	5.48	1.66	0.291
	C4H8OS	3268-49-3	43.39a	24.77b	17.98b	4.56	0.028
	C7H10O	100-50-5	1.45	1.08	0.89	0.13	0.212
	C5H4O2	35796	4.20a	2.01b	2.67ab	0.44	0.09
	C7H6O	100-52-7	1569.31	1122.49	1223.96	87.07	0.063
	C6H6O2	620-02-0	0.43	0.17	0.24	0.05	0.068
	C9H14O	42452-48-2	2.16	0.73	0.7	0.43	0.313
	C8H8O	620-23-5	0.89	0.57	0.73	0.07	0.177
	C8H8O	122-78-1	74.96a	29.68b	36.64b	8.19	0.018
	C9H14O	5910-87-2	0.68	0.31	0.43	0.1	0.33
	C5H4OS	35857	1.86	0.74	1.28	0.25	0.209
	C5H4OS	498-62-4	1.12	0.58	0.74	0.11	0.121
	C12H24O	112-54-9	3.03	2.28	2.24	0.39	0.71
	C9H10O	4748-78-1	6.53	2.46	2.2	1.19	0.278
	C6H6OS	13679-70-4	0.89	0.74	0.56	0.06	0.082
	C11H20O	53448-07-0	3.04	1.24	1.3	0.46	0.203
	C9H10O	5973-71-7	0.67	0.6	0.46	0.07	0.546
	C9H8O	57194-69-1	0.57	0.38	0.48	0.04	0.207
	C10H12O	5779-72-6	0.29	0.19	0.2	0.02	0.102
	C10H100	4411-89-6	6.77a	4.04b	2.98b	0.68	0.03
	C10H100	101-39-3	0.33a	0.20b	0.14b	0.03	0.022
	C12H16O	6853-57-2	2.21	0.85	0.73	0.4	0.261
	C16H32O	629-80-1	29.87	16.84	30.29	4.7	0.474
	C6H12O	66-25-1	441.53	323.53	206.42	88.15	0.618
	C5H8O	497-03-0	6.52	5.98	4.17	0.5	0.122
Ketone	C7H14O	106-35-4	0.49694	0.6	1.35	0.222	0.257
	C7H14O	110-43-0	62.52	15.76	11.39	10.656	0.069
	C8H16O	106-68-3	1.74	2.44	1.18	0.487	0.636
	C4H8O2	513-86-0	321.64	44.22	159.5	81.398	0.432
	C8H16O	111-13-7	2.21	2.95	1.39	0.669	0.697
	C6H10O	108-94-1	0.35	0.33	0.32	0.02	0.883
	C8H14O	4312-99-6	1.99	1.31	1.16	0.295	0.54
	C8H14O2	585-25-1	172.79	63.46	51.54	40.795	0.468
	C8H14O	110-93-0	13.36	11.7	9.37	1.085	0.367
	C9H18O	821-55-6	1.82	1.37	1.33	0.181	0.54
	C10H16O	546-49-6	0.69	0.34	0.33	0.096	0.244
	C8H14O	1669-44-9	0.4	0.27	0.22	0.061	0.534
	C8H12O	38284-27-4	0.59	0.21	0.17	0.118	0.312
	C11H22O	2216-87-7	0.92	0.54	0.32	0.192	0.488
	C8H16O	928-68-7	3.68	2.38	1.99	0.816	0.736
	C15H24O2	10396-80-2	1.95	1.75	1.51	0.15	0.556
	C7H14O	3879-26-3	2.34	1.64	1.94	0.191	0.369
Acids	C2H4O2	64-19-7	26.62	8.91	14.77	2.899	<0.01
	C4H8O2	107-92-6	10.71	1.76	5.8	2.293	0.316
	C5H10O2	503-74-2	0.91	0.01	0.19	0.295	0.475
Alkene	C5H10O2	109-52-4	2.15	0.47	1	0.355	0.138
	C7H14O2	111-14-8	1.75	0.27	0.9	0.271	0.052
	C10H20O2	334-48-5	1.27	0.68	1.63	0.239	0.295
	C7H6O2	65-85-0	2.91	1.55	2.46	0.647	0.741
	C6H12O2	142-62-1	30.77	5.83	8.41	6.644	0.268
	C3H6S	1072-43-1	0.4	0.51	0.34	0.074	0.692
	C10H16	80-56-8	5.04	3.57	4.13	1.031	0.876
	C10H16	79-92-5	0.74	0.58	0.47	0.12	0.703
	C10H16	138-86-3	2.65	3.13	1.17	0.482	0.247
	C8H8	100-42-5	12.78	25.37	21.39	8.066	0.849
	C15H22	73209-42-4	0.19	0.41	0.25	0.08	0.57
Alkanes	C9H20	2213-23-2	12.61	6.98	8.02	1.458	0.271
Fatty Acid Methyl Ester	C5H10O2	623-42-7	6.23	1.71	4.68	1169.12	0.311
	C6H12O2	556-24-1	0.63	0.07	0.09	188.229	0.435
	C7H14O2	106-70-7	0.21	0.31	0.5	176.52	0.835
	C6H12O3	108-65-6	0.15	0.12	0.13	11.201	0.6
	C8H16O2	106-73-0	1.39	0.96	1.8	316.047	0.622
	C9H18O2	111-11-5	2.88	5.34	8.7	1087.74	0.063
	C10H20O2	106-32-1	0.96	0.22	1.3	322.341	0.429
	C9H18O2	112-32-3	22.81	8.32	7.93	3684.51	0.174
	C10H20O2	1731-84-6	1.26	3.03	3.18	459.256	0.167
	C12H20O2	76-49-3	0.06b	0.25a	0.22a	33.5	<0.01
	C11H22O2	110-42-9	0.8	2.06	3.02	408.68	0.055
	C5H8O2	1679-47-6	1.31	0.76	0.8	121.791	0.105
Methyl Ester	C10H20OS	2432-79-3	9.58	3.15	2.25	1784.62	0.197
	C12H24O2	1731-86-8	0.73	0.54	0.72	65.711	0.453
	C6H10O2	695-06-7	2.27	1.05	1.11	262.579	0.075
	C9H10O2	99-75-2	0.9	0.56	0.72	54.188	0.559
	C8H8O3	119-36-8	0.23	0.31	0.49	76.628	0.207
	C13H26O2	111-82-0	0.85	0.37	0.42	61.513	0.24
	C7H12O2	105-21-5	0.61a	0.32b	1.33b	93.667	0.036
	C15H30O2	124-10-7	0.61b	0.32b	1.33a	168.667	<0.01
	C9H16O2	104-61-0	3.89	1.78	1.57	494.87	0.085
	C16H32O2	7132-64-1	0.03b	0.06b	0.16a	23.485	0.029
	C10H18O2	705-86-2	0.35	0.14	0.28	45	0.153
	C17H34O2	112-39-0	3.53b	3.24a	5.86a	510.928	0.04
	C10H10O4	131-11-3	0.95	0.58	0.56	124.319	0.411
Arene	C8H10	100-41-4	54.78	36.72	64.64	11346.2	0.659
	C8H10	106-42-3	94.57	30.38	125.27	27098.4	0.395
	C8H10	95-47-6	36.12	33.89	29.04	7426.38	0.942
	C9H12	108-67-8	14.79	14.37	23.83	3748.88	0.573
	C10H14	527-84-4	6.41	2.77	2.55	1318.96	0.465
	C10H14	1074-55-1	4.42	5	3.78	983.022	0.907
	C10H14	135-01-3	0.51	0.75	0.95	125.851	0.411
	C10H14	104-51-8	0.71	0.59	0.75	103.364	0.835
	C10H14	99-87-6	4.39	4.73	4.36	1573.68	0.996
	C10H14	933-98-2	0.71	1.88	1.36	265.286	0.213
	C10H14	95-93-2	3.71	6.51	6.96	818.582	0.232
	C10H12	1195-32-0	0.81	1.25	1.51	184.422	0.332
	C12H10	92-52-4	0.34	0.3	0.35	21.232	0.638
	C11H16	700-12-9	0.36	0.5	0.5	35.196	0.177
Phenol	C6H6O	108-95-2	5.97	3.57	4.52	0.507	0.144
	C7H8O	106-44-5	7.12a	3.75b	4.68b	0.577	0.014
Note: The letters a-b indicate significant differences (P < 0.05)

## Sheet: Table S4
Table S4 Summary of sequencing data quality control
Sample	Raw Reads/bp	Clean date/bp	Q20/%	Q30/%	G+C base percentage / %	Mapping rate / %
X1	46514602	45461840	97.64	93.34	51.25	0.9758
X2	48285430	47010222	97.76	93.65	51	0.9763
T1	48693724	47451432	98.01	94.17	50.89	0.9789
T2	47252842	45943294	97.93	94.02	50.75	0.9777
C1	49538016	48221614	97.94	94.03	51.44	0.9789
C2	43932584	42691614	98.05	94.23	50.82	0.9814
Note: Q20/%: Percentage of the number of bases whose quality value reached above Q20 in CleanData, Q30/%: Percentage of the number of bases whose quality value reached above Q30 in CleanData.

## Sheet: Table S5
Table S5 RNA-seq analysis of enriched GO and KEGG pathways
ONTOLOGY	Description	GeneRatio	BgRatio	pvalue	p.adjust	qvalue	geneID	Count
CC	extracellular matrix	27/316	321/15514	4.72938118093349e-10	2.51839547884708e-06	2.27308994443603e-06	ADAMTS3/ASPN/CCN3/CHI3L1/COL8A1/CPA5/ECM2/ELN/FBN1/FBN2/FREM1/FREM2/GPLD1/HAPLN2/ITGB2/LOXL1/LOXL2/LPL/NEPN/NID1/OLFML2B/POSTN/PRSS2/RUNX1/THBS3/THBS4/WNT4	27
BP	negative regulation of viral genome replication	9/316	53/15514	1.08569689578479e-06	0.00228726370640383	0.00206447167451245	IFIT1/ISG15/MX1/OAS1X/OAS1Y/OAS1Z/PARP10/PTGDS/RSAD2	9
BP	cellular response to type I interferon	8/316	43/15514	2.11410969168717e-06	0.00228726370640383	0.00206447167451245	IFI6/IFIT1/ISG15/MX1/OAS1X/OAS1Y/OAS1Z/RSAD2	8
BP	type I interferon signaling pathway	8/316	43/15514	2.11410969168717e-06	0.00228726370640383	0.00206447167451245	IFI6/IFIT1/ISG15/MX1/OAS1X/OAS1Y/OAS1Z/RSAD2	8
BP	skeletal muscle organ development	18/316	240/15514	2.14766545202237e-06	0.00228726370640383	0.00206447167451245	ACTC1/ATF3/BTG2/CEMIP2/CRHR2/ELN/HEYL/ITGA8/ITGB2/KIF5C/MYL6B/MYMX/NAV2/PITX1/PITX2/RCAN1/THBS3/THBS4	18
BP	response to type I interferon	8/316	46/15514	3.60748543162566e-06	0.00299641409142091	0.00270454692195264	IFI6/IFIT1/ISG15/MX1/OAS1X/OAS1Y/OAS1Z/RSAD2	8
BP	negative regulation of viral life cycle	10/316	78/15514	3.93894810139838e-06	0.00299641409142091	0.00270454692195264	IFIT1/ISG15/MX1/OAS1X/OAS1Y/OAS1Z/PARP10/PTGDS/PTX3/RSAD2	10
CC	collagen-containing extracellular matrix	14/316	163/15514	6.26955185248416e-06	0.00396737656564403	0.00358093232492822	COL8A1/CPA5/ECM2/FBN1/FREM1/FREM2/ITGB2/LOXL1/LOXL2/NEPN/NID1/RUNX1/THBS3/THBS4	14
BP	cellular response to interferon-gamma	13/316	142/15514	6.70542518137019e-06	0.00396737656564403	0.00358093232492822	AQP4/ARG2/BOLA-DQA5/CCL1/CCL2/CCL21/MT1E/MT2A/OAS1X/OAS1Y/OAS1Z/PTAFR/RAB7B	13
BP	defense response to virus	12/316	133/15514	1.75830749668016e-05	0.00936298741982185	0.0084509810840438	IFI44L/IFIH1/ISG15/MX1/OAS1X/OAS1Y/OAS1Z/PRF1/RSAD2/RTP4/STING1/TLR9	12
BP	negative regulation of viral process	10/316	95/15514	2.33123607115263e-05	0.0112853018898979	0.0101860515797922	IFIT1/ISG15/MX1/OAS1X/OAS1Y/OAS1Z/PARP10/PTGDS/PTX3/RSAD2	10
BP	response to interferon-gamma	13/316	163/15514	2.96365153368603e-05	0.0131512036807318	0.0118702043007109	AQP4/ARG2/BOLA-DQA5/CCL1/CCL2/CCL21/MT1E/MT2A/OAS1X/OAS1Y/OAS1Z/PTAFR/RAB7B	13
BP	specification of loop of Henle identity	3/316	4/15514	3.29819902831154e-05	0.0135099306351992	0.0121939892820004	IRX1/IRX2/IRX3	3
BP	cell adhesion mediated by integrin	7/316	47/15514	4.25328292088041e-05	0.0161776653954916	0.0146018720426616	CCN3/FBN1/ITGA8/ITGB2/TBC1D1/THBS3/THBS4	7
BP	regulation of viral genome replication	9/316	87/15514	6.85489226568457e-05	0.0243348675431802	0.0219645179544672	IFIT1/ISG15/MX1/OAS1X/OAS1Y/OAS1Z/PARP10/PTGDS/RSAD2	9
MF	2-5-oligoadenylate synthetase activity	3/316	5/15514	8.12082818166278e-05	0.0270271312920964	0.0243945404457054	OAS1X/OAS1Y/OAS1Z	3
BP	interferon-gamma-mediated signaling pathway	7/316	53/15514	9.39081910006912e-05	0.0294153598281577	0.0265501424216196	BOLA-DQA5/MT1E/MT2A/OAS1X/OAS1Y/OAS1Z/PTAFR	7
BP	regulation of viral life cycle	11/316	139/15514	0.000129778507429271	0.0380832597507374	0.0343737413435862	HS3ST5/IFIT1/ISG15/MX1/OAS1X/OAS1Y/OAS1Z/PARP10/PTGDS/PTX3/RSAD2	11
BP	response to virus	15/316	242/15514	0.000135883931504978	0.0380832597507374	0.0343737413435862	CXCR4/IFI44/IFI44L/IFIH1/IFIT1/ISG15/MX1/OAS1X/OAS1Y/OAS1Z/PRF1/RSAD2/RTP4/STING1/TLR9	15
BP	proximal/distal pattern formation involved in nephron development	3/316	6/15514	0.000159963276351334	0.040562116503374	0.0366111438506362	IRX1/IRX2/IRX3	3
BP	specification of nephron tubule identity	3/316	6/15514	0.000159963276351334	0.040562116503374	0.0366111438506362	IRX1/IRX2/IRX3	3
BP	extracellular structure organization	20/316	397/15514	0.000192939387795527	0.0454050314280955	0.0409823322956628	ADAMTS3/COL8A1/CREB3L1/ECM2/ELN/FBN1/FBN2/HAPLN2/ITGA2B/ITGA8/ITGB2/LOXL2/LPL/NEPN/NID1/OLFML2B/PLTP/POSTN/PRSS2/SULF2	20
CC	basement membrane	10/316	122/15514	0.000196115628703511	0.0454050314280955	0.0409823322956628	COL8A1/FBN1/FREM1/FREM2/ITGB2/LOXL1/LOXL2/NID1/RUNX1/THBS4	10
BP	regulation of interleukin-6 production	10/316	123/15514	0.000209692299712864	0.0465254789987918	0.0419936421267078	AFAP1L2/AQP4/ARHGEF2/BANK1/BPI/CRHR2/IFIH1/PTAFR/RAB7B/TLR9	10
BP	extracellular matrix organization	18/316	340/15514	0.000220229905551315	0.0469089698824301	0.0423397788946233	ADAMTS3/COL8A1/CREB3L1/ECM2/ELN/FBN1/FBN2/HAPLN2/ITGA2B/ITGA8/ITGB2/LOXL2/NEPN/NID1/OLFML2B/POSTN/PRSS2/SULF2	18
BP	extracellular matrix constituent conferring elasticity	3/316	7/15514	0.000275711484562082	0.0543764316775218	0.0490798689477765	ELN/FBN1/FBN2	3
BP	regulation of toll-like receptor 9 signaling pathway	3/316	7/15514	0.000275711484562082	0.0543764316775218	0.0490798689477765	RAB7B/RSAD2/TLR9	3
BP	regulation of cellular extravasation	5/316	30/15514	0.000318520029620027	0.060575684204523	0.0546752802723701	CCL2/CCL21/PAWR/PTAFR/RIPK3	5
BP	regulation of viral process	12/316	183/15514	0.000378343155840359	0.0694716312017211	0.0627047132329249	CXCR4/HS3ST5/IFIT1/ISG15/MX1/OAS1X/OAS1Y/OAS1Z/PARP10/PTGDS/PTX3/RSAD2	12
BP	proximal/distal pattern formation involved in metanephric nephron development	2/316	2/15514	0.000413597644582605	0.0734135819134124	0.06626269632155	IRX1/IRX2	2
BP	skeletal system morphogenesis	15/316	271/15514	0.000459258686611135	0.0788887905227192	0.0712045895778079	BARX2/FBN2/FREM1/HOXB2/HOXB3/HOXB5/HOXB6/IRX5/OTOR/PITX2/RFLNA/SFRP4/TBX1/THBS3/WNT4	15
BP	muscle organ development	20/316	427/15514	0.000494410874254095	0.0822730595438455	0.0742592122317171	ACTC1/ATF3/BTG2/CEMIP2/CRHR2/ELN/HEYL/ITGA8/ITGB2/KIF5C/MYL6B/MYMX/NAV2/PITX1/PITX2/RCAN1/TAGLN/TBX1/THBS3/THBS4	20
BP	heparin binding	10/316	139/15514	0.000559721002744312	0.0854551981206799	0.0771313930554039	CCL2/CCN3/ECM2/FBN1/FGF10/FSTL1/LPL/POSTN/THBS3/THBS4	10
BP	nephron development	10/316	140/15514	0.000592135278976469	0.0854551981206799	0.0771313930554039	GPR4/HEYL/IRX1/IRX2/IRX3/NID1/SIM1/SULF2/WNK4/WNT4	10
BP	cell-substrate adhesion	11/316	166/15514	0.000602686224760442	0.0854551981206799	0.0771313930554039	CCL21/ECM2/FERMT3/FREM1/GP5/ITGA2B/ITGA8/ITGB2/MYO1G/NID1/THBS3	11
BP	skeletal muscle tissue development	11/316	166/15514	0.000602686224760442	0.0854551981206799	0.0771313930554039	ACTC1/ATF3/BTG2/CRHR2/ELN/HEYL/KIF5C/MYL6B/PITX1/PITX2/RCAN1	11
BP	connective tissue development	14/316	249/15514	0.00060484224990568	0.0854551981206799	0.0771313930554039	BARX2/BDH1/CCN3/CHI3L1/GPLD1/GPR4/HOXB3/OTOR/PITX1/RUNX1/SULF2/TBX1/THBS3/THBS4	14
MF	glycosaminoglycan binding	12/316	194/15514	0.000638722176565272	0.0854551981206799	0.0771313930554039	CCL2/CCN3/DPYSL3/ECM2/FBN1/FGF10/FSTL1/HAPLN2/LPL/POSTN/THBS3/THBS4	12
BP	regulation of leukocyte tethering or rolling	3/316	9/15514	0.000641916981188206	0.0854551981206799	0.0771313930554039	CCL21/PAWR/PTAFR	3
BP	regulation of ribonuclease activity	3/316	9/15514	0.000641916981188206	0.0854551981206799	0.0771313930554039	OAS1X/OAS1Y/OAS1Z	3
BP	cell-matrix adhesion	9/316	119/15514	0.000733174414267719	0.0952232623408684	0.0859479942373917	CCL21/ECM2/FREM1/GP5/ITGA2B/ITGA8/ITGB2/NID1/THBS3	9
BP	negative regulation of cytokine production	14/316	256/15514	0.000793598709497175	0.10061697923982	0.0908163335229098	ADCY7/ANXA1/AQP4/ARG2/BANK1/BPI/IFIH1/INHA/ISG15/LGR6/POMC/TLR9/UBA7/ZNF683	14
BP	response to glucocorticoid	14/316	257/15514	0.000824247477406875	0.102072507376549	0.0921300852347562	AANAT/ANXA1/ARG2/BDH1/C1QB/CACNA1G/CCL2/CCND1/CRHR2/ELN/FOXO1/PTAFR/PTGDS/SFRP4	14
BP	regulation of symbiotic process	13/316	233/15514	0.00100855354354693	0.122057900440622	0.110168791383619	CXCR4/HS3ST5/IFIT1/ISG15/MX1/OAS1X/OAS1Y/OAS1Z/PARP10/POMC/PTGDS/PTX3/RSAD2	13
BP	cartilage development	11/316	179/15514	0.0011223556687842	0.122982233540957	0.11100308936951	BARX2/CCN3/CHI3L1/GPLD1/HOXB3/OTOR/PITX1/RUNX1/SULF2/TBX1/THBS3	11
BP	ameboidal-type cell migration	19/316	425/15514	0.00118039346401274	0.122982233540957	0.11100308936951	CCN3/CXCR4/FGF10/GMFG/GPLD1/ITGA8/ITGB2/KIF26A/LGR6/LOXL2/MYH7B/NAV2/PITX2/PLEKHG5/PRSS2/SEMA3A/TBX1/UNC5A/WNT4	19
BP	loop of Henle development	3/316	11/15514	0.00122327123433964	0.122982233540957	0.11100308936951	IRX1/IRX2/IRX3	3
BP	calcium-dependent protein kinase C activity	2/316	3/15514	0.0012240485216283	0.122982233540957	0.11100308936951	PRKCB/PRKCG	2
BP	pattern specification involved in metanephros development	2/316	3/15514	0.0012240485216283	0.122982233540957	0.11100308936951	IRX1/IRX2	2
BP	regulation of hair follicle cell proliferation	2/316	3/15514	0.0012240485216283	0.122982233540957	0.11100308936951	FGF10/RUNX1	2
BP	sequestering of TGFbeta in extracellular matrix	2/316	3/15514	0.0012240485216283	0.122982233540957	0.11100308936951	FBN1/FBN2	2
BP	GPI anchor release	2/316	3/15514	0.0012240485216283	0.122982233540957	0.11100308936951	GPLD1/NOTUM	2
BP	negative regulation of lymphocyte chemotaxis	2/316	3/15514	0.0012240485216283	0.122982233540957	0.11100308936951	CCL2/PADI2	2
MF	motor activity	8/316	104/15514	0.00128436433942639	0.125898915420836	0.1136356704347	DYNC1I1/KIF26A/KIF5C/MYH1/MYH7B/MYL6B/MYO1B/MYO1G	8
CC	filamentous actin	4/316	24/15514	0.00130036438462836	0.125898915420836	0.1136356704347	ACTC1/DPYSL3/MYO1B/PDLIM4	4
BP	monocarboxylic acid transmembrane transporter activity	6/316	60/15514	0.00135286591859566	0.128643053866462	0.116112514742627	SLC16A12/SLC16A13/SLC16A7/SLC16A9/SLC27A6/SLC6A1	6
BP	actin filament bundle organization	7/316	82/15514	0.00140167372823004	0.13094583513728	0.118190992485658	ACTC1/DPYSL3/ELN/KIF5C/MYO1B/PAWR/RFLNA	7
BP	pattern specification involved in kidney development	3/316	12/15514	0.0016065383979337	0.142580282816616	0.128692181139742	IRX1/IRX2/IRX3	3
BP	renal system pattern specification	3/316	12/15514	0.0016065383979337	0.142580282816616	0.128692181139742	IRX1/IRX2/IRX3	3
BP	immunological synapse formation	3/316	12/15514	0.0016065383979337	0.142580282816616	0.128692181139742	CCL21/CD6/PRF1	3
BP	extracellular matrix binding	6/316	63/15514	0.00174503050562847	0.152332581024125	0.13749455200517	ELN/ITGA2B/ITGA8/NID1/OLFML2B/THBS4	6
BP	response to estradiol	12/316	219/15514	0.00181728995807992	0.15608175849638	0.140878539025346	ALDH1A1/ANXA1/BDH1/CCL2/CCND1/FGF10/FOSL2/PAWR/SFRP4/SLC6A1/TFPI/WNT4	12
BP	response to corticosteroid	14/316	281/15514	0.00192225586006529	0.156492070949395	0.14124888479465	AANAT/ANXA1/ARG2/BDH1/C1QB/CACNA1G/CCL2/CCND1/CRHR2/ELN/FOXO1/PTAFR/PTGDS/SFRP4	14
BP	muscle tissue development	17/316	377/15514	0.0019305904662561	0.156492070949395	0.14124888479465	ACTC1/ATF3/BTG2/CEMIP2/CRHR2/ELN/FHL2/FOXO1/HEYL/ITGA8/KIF5C/MYL6B/PITX1/PITX2/RCAN1/TBX1/XIRP1	17
BP	external side of plasma membrane	14/316	282/15514	0.00198643396004402	0.156492070949395	0.14124888479465	ANO1/ANXA1/AQP4/BOLA-DQA5/CA4/CCL21/CD3E/CXCR4/FCER2/IL2RB/ITGA2B/ITGB2/PDPN/PRND	14
BP	sulfur compound binding	12/316	222/15514	0.00203606349726438	0.156492070949395	0.14124888479465	CCL2/CCN3/DPYSL3/ECM2/FBN1/FGF10/FSTL1/HS3ST5/LPL/POSTN/THBS3/THBS4	12
BP	response to steroid hormone	19/316	446/15514	0.00204939801434896	0.156492070949395	0.14124888479465	AANAT/ANXA1/ARG2/BDH1/C1QB/CA4/CACNA1G/CCL2/CCND1/CRHR2/ELN/FHL2/FOSL2/FOXO1/PADI2/PTAFR/PTGDS/SFRP4/TFPI	19
BP	endothelial cell migration	6/316	65/15514	0.00205071545912341	0.156492070949395	0.14124888479465	CCN3/GPLD1/ITGB2/LOXL2/PLEKHG5/PRSS2	6
BP	myelin maintenance	3/316	13/15514	0.00205717276365401	0.156492070949395	0.14124888479465	CXCR4/EPB41L3/MYRF	3
BP	regulation of leukocyte adhesion to vascular endothelial cell	3/316	13/15514	0.00205717276365401	0.156492070949395	0.14124888479465	CCL21/PAWR/PTAFR	3
BP	purine nucleotide biosynthetic process	11/316	194/15514	0.00213272271672351	0.156835215330291	0.141558605030513	ACSS1/ADCY1/ADCY7/NT5E/OAS1X/OAS1Y/OAS1Z/PFKFB3/PRKAG3/SCD5/SLC25A1	11
BP	negative regulation of immune system process	20/316	482/15514	0.00214464048019226	0.156835215330291	0.141558605030513	ANXA1/ARG2/BANK1/BOLA-DOB/BOLA-DQA5/BPI/C1QA/CCL2/CCL21/CCN3/CD37/FBN1/IFIT1/INHA/LGR6/PADI2/PAWR/RAB7B/RUNX1/TLR9	20
BP	circulatory system process	19/316	449/15514	0.00220936975120937	0.156835215330291	0.141558605030513	ACTC1/CACNA1G/CRHR2/CXCR4/DUSP5/ELN/EPB41L3/EPHX2/ERAP2/GCGR/HOXB2/MYL4/PITX2/POMC/PON1/POSTN/PTAFR/RCAN1/SCN3B	19
BP	regulation of leukocyte migration	11/316	195/15514	0.0022202598233812	0.156835215330291	0.141558605030513	ANXA1/CCL1/CCL2/CCL21/CCN3/ITGA2B/PADI2/PAWR/PTAFR/RIPK3/THBS4	11
BP	positive regulation of cytokine production	18/316	416/15514	0.00225537612868725	0.156835215330291	0.141558605030513	AFAP1L2/ANXA1/ARHGEF2/CCL2/CD3E/CD6/CRHR2/IFIH1/LPL/POSTN/PTAFR/RAB7B/RSAD2/RUNX1/STING1/SULF2/TLR9/ZBP1	18
MF	extracellular matrix structural constituent	6/316	67/15514	0.00239521144752324	0.156835215330291	0.141558605030513	CHI3L1/ELN/FBN1/FBN2/HAPLN2/NID1	6
BP	nephron tubule development	7/316	90/15514	0.00240009885622977	0.156835215330291	0.141558605030513	HEYL/IRX1/IRX2/IRX3/SIM1/WNK4/WNT4	7
BP	positive regulation of dermatome development	2/316	4/15514	0.00241511505297349	0.156835215330291	0.141558605030513	PITX2/WNT4	2
BP	positive regulation of neutrophil activation	2/316	4/15514	0.00241511505297349	0.156835215330291	0.141558605030513	ITGB2/PTAFR	2
BP	positive regulation of neutrophil degranulation	2/316	4/15514	0.00241511505297349	0.156835215330291	0.141558605030513	ITGB2/PTAFR	2
BP	positive regulation of skeletal muscle fiber differentiation	2/316	4/15514	0.00241511505297349	0.156835215330291	0.141558605030513	TBX1/WNT4	2
BP	positive regulation of toll-like receptor 9 signaling pathway	2/316	4/15514	0.00241511505297349	0.156835215330291	0.141558605030513	RSAD2/TLR9	2
BP	cellular response to interferon-alpha	3/316	14/15514	0.00257898690881345	0.16545909987267	0.149342475911759	OAS1X/OAS1Y/OAS1Z	3
BP	kidney development	15/316	325/15514	0.00281122170390758	0.176990123457298	0.159750314545297	ALDH1A1/ARG2/FBN1/FGF10/GPR4/HEYL/IRX1/IRX2/IRX3/ITGA8/NID1/SIM1/SULF2/WNK4/WNT4	15
BP	negative regulation of multi-organism process	12/316	231/15514	0.00282519445894278	0.176990123457298	0.159750314545297	ARG2/GRB14/IFIT1/ISG15/MX1/OAS1X/OAS1Y/OAS1Z/PARP10/PTGDS/PTX3/RSAD2	12
BP	metanephros development	7/316	93/15514	0.00289032277437986	0.178964753181078	0.161532604502062	FBN1/FGF10/IRX1/IRX2/IRX3/ITGA8/WNT4	7
BP	inflammatory response	17/316	393/15514	0.00296880768281744	0.18100811771072	0.163376934117549	AFAP1L2/ANXA1/APOL3/CCL1/CCL2/CCL21/CD6/CHI3L1/CXCR4/EPHX2/ITGB2/PDPN/PTAFR/PTX3/TNFRSF25/TNFRSF6B/UHRF1	17
BP	muscle attachment	6/316	70/15514	0.00299130786075932	0.18100811771072	0.163376934117549	CEMIP2/ITGA8/ITGB2/NAV2/THBS3/THBS4	6
MF	calcium ion binding	16/316	362/15514	0.00316278267788191	0.189233907412597	0.170801486779525	ACTC1/ANXA1/ASPN/CABYR/CEMIP2/FBN1/FBN2/LOXL2/PON1/PRF1/PRSS2/PVALB/RASGRP3/RUNX1/THBS3/THBS4	16
BP	purine-containing compound biosynthetic process	11/316	205/15514	0.00326665342421737	0.192439117486026	0.173694491809478	ACSS1/ADCY1/ADCY7/NT5E/OAS1X/OAS1Y/OAS1Z/PFKFB3/PRKAG3/SCD5/SLC25A1	11
BP	blood circulation	18/316	431/15514	0.00328863092793021	0.192439117486026	0.173694491809478	ACTC1/CACNA1G/CRHR2/CXCR4/DUSP5/ELN/EPHX2/ERAP2/GCGR/HOXB2/MYL4/PITX2/POMC/PON1/POSTN/PTAFR/RCAN1/SCN3B	18
BP	innervation	4/316	31/15514	0.00344312581015721	0.193998685272392	0.175102149138372	NPTX1/PRKCG/SEMA3A/SULF2	4
BP	regulation of type 2 immune response	4/316	31/15514	0.00344312581015721	0.193998685272392	0.175102149138372	ANXA1/ARG2/CLCF1/RSAD2	4
BP	cellular response to glucocorticoid stimulus	7/316	96/15514	0.00345382827733567	0.193998685272392	0.175102149138372	ANXA1/ARG2/CACNA1G/CCL2/CRHR2/ELN/FOXO1	7
BP	double-stranded RNA binding	6/316	73/15514	0.00369184187887224	0.193998685272392	0.175102149138372	IFIH1/MYH1/OAS1X/OAS1Y/OAS1Z/STRBP	6
BP	negative regulation of interleukin-8 production	3/316	16/15514	0.00384983465114199	0.193998685272392	0.175102149138372	ANXA1/BPI/TLR9	3
BP	positive regulation of killing of cells of other organism	3/316	16/15514	0.00384983465114199	0.193998685272392	0.175102149138372	FCER2/POMC/PRF1	3
MF	structural molecule activity conferring elasticity	3/316	16/15514	0.00384983465114199	0.193998685272392	0.175102149138372	ELN/FBN1/FBN2	3
BP	high-density lipoprotein particle	3/316	16/15514	0.00384983465114199	0.193998685272392	0.175102149138372	APOL3/PLTP/PON1	3
BP	monocyte chemotaxis	4/316	32/15514	0.00387280723992921	0.193998685272392	0.175102149138372	ANXA1/CCL1/CCL2/CCL21	4
BP	regulation of interferon-gamma production	7/316	98/15514	0.00387355190909917	0.193998685272392	0.175102149138372	CD3E/INHA/ISG15/RIPK3/RUNX1/TLR9/ZNF683	7
BP	endothelial cell-cell adhesion	2/316	5/15514	0.00397105290041139	0.193998685272392	0.175102149138372	CCN3/THBS4	2
BP	maintenance of protein location in extracellular region	2/316	5/15514	0.00397105290041139	0.193998685272392	0.175102149138372	FBN1/FBN2	2
BP	positive regulation of leukocyte tethering or rolling	2/316	5/15514	0.00397105290041139	0.193998685272392	0.175102149138372	PAWR/PTAFR	2
BP	regulation of dermatome development	2/316	5/15514	0.00397105290041139	0.193998685272392	0.175102149138372	PITX2/WNT4	2
BP	regulation of skeletal muscle fiber differentiation	2/316	5/15514	0.00397105290041139	0.193998685272392	0.175102149138372	TBX1/WNT4	2
BP	sequestering of extracellular ligand from receptor	2/316	5/15514	0.00397105290041139	0.193998685272392	0.175102149138372	FBN1/FBN2	2
BP	somatotropin secreting cell differentiation	2/316	5/15514	0.00397105290041139	0.193998685272392	0.175102149138372	PITX2/WNT4	2
BP	hypothalamus cell migration	2/316	5/15514	0.00397105290041139	0.193998685272392	0.175102149138372	PITX2/SEMA3A	2
BP	positive regulation of interleukin-6 production	6/316	75/15514	0.00422208310728369	0.202545878795366	0.182816799126196	ARHGEF2/CRHR2/IFIH1/PTAFR/RAB7B/TLR9	6
BP	proximal/distal pattern formation	6/316	75/15514	0.00422208310728369	0.202545878795366	0.182816799126196	EPB41L3/FGF10/IRX1/IRX2/IRX3/IRX5	6
BP	renal system development	17/316	409/15514	0.00443456831022943	0.210839966535462	0.190302997222816	ALDH1A1/ARG2/EMX2/FBN1/FGF10/GPR4/HEYL/IRX1/IRX2/IRX3/ITGA8/MYH7B/NID1/SIM1/SULF2/WNK4/WNT4	17
BP	cellular response to exogenous dsRNA	3/316	17/15514	0.00460496450919141	0.213229878360385	0.192460118526023	IFIH1/IFIT1/STING1	3
MF	filamin binding	3/316	17/15514	0.00460496450919141	0.213229878360385	0.192460118526023	DPYSL3/RFLNA/XIRP1	3
BP	negative regulation of leukocyte chemotaxis	3/316	17/15514	0.00460496450919141	0.213229878360385	0.192460118526023	CCL2/CCN3/PADI2	3
BP	glucose homeostasis	12/316	246/15514	0.0046792683807892	0.213637737146117	0.192828249628697	AQP4/CCL2/FBN1/FOXO1/GCGR/MLXIP/MLXIPL/NPTX1/OAS1X/OAS1Y/OAS1Z/POMC	12
BP	mesenchymal cell differentiation	10/316	185/15514	0.00469401225278793	0.213637737146117	0.192828249628697	FGF10/HEYL/IRX1/LGR6/LOXL2/PITX2/SEMA3A/TBX1/WNT4/ZIC3	10
BP	mononuclear cell migration	4/316	34/15514	0.00483811829715069	0.218330338409554	0.197063765787601	ANXA1/CCL1/CCL2/CCL21	4
BP	urogenital system development	18/316	449/15514	0.00502067632127877	0.224664717737895	0.202781141821839	ALDH1A1/ANXA1/ARG2/EMX2/FBN1/FGF10/GPR4/HEYL/IRX1/IRX2/IRX3/ITGA8/MYH7B/NID1/SIM1/SULF2/WNK4/WNT4	18
BP	cellular response to corticosteroid stimulus	7/316	104/15514	0.00536680230290036	0.237595087504429	0.214452022642989	ANXA1/ARG2/CACNA1G/CCL2/CRHR2/ELN/FOXO1	7
BP	cellular copper ion homeostasis	3/316	18/15514	0.00544349308460851	0.237595087504429	0.214452022642989	MT1E/MT2A/PRND	3
BP	deactivation of rhodopsin mediated signaling	3/316	18/15514	0.00544349308460851	0.237595087504429	0.214452022642989	GRK3/PRKCB/PRKCG	3
BP	ISG15-protein conjugation	2/316	6/15514	0.00587659771244144	0.239668130057255	0.216323139479402	ISG15/UBA7	2
BP	phospholipase C-inhibiting G protein-coupled receptor signaling pathway	2/316	6/15514	0.00587659771244144	0.239668130057255	0.216323139479402	PRKCB/PRKCG	2
MF	arylesterase activity	2/316	6/15514	0.00587659771244144	0.239668130057255	0.216323139479402	PON1/PON3	2
MF	MHC class II receptor activity	2/316	6/15514	0.00587659771244144	0.239668130057255	0.216323139479402	BOLA-DOB/BOLA-DQA5	2
BP	negative regulation of follicle-stimulating hormone secretion	2/316	6/15514	0.00587659771244144	0.239668130057255	0.216323139479402	CRHR2/INHA	2
BP	embryonic skeletal system morphogenesis	8/316	133/15514	0.0058987940631486	0.239668130057255	0.216323139479402	HOXB2/HOXB3/HOXB5/HOXB6/IRX5/PITX2/TBX1/WNT4	8
MF	organic anion transmembrane transporter activity	11/316	222/15514	0.00592414667893392	0.239668130057255	0.216323139479402	SLC16A12/SLC16A13/SLC16A7/SLC16A9/SLC22A17/SLC22A18/SLC25A1/SLC27A6/SLC6A1/SLC7A8/SLCO4A1	11
BP	cranial nerve morphogenesis	4/316	36/15514	0.0059529517710279	0.239668130057255	0.216323139479402	HOXB2/HOXB3/SEMA3A/TBX1	4
BP	hypothalamus development	4/316	36/15514	0.0059529517710279	0.239668130057255	0.216323139479402	CRHR2/PITX2/SEMA3A/SIM1	4
BP	muscle filament sliding	4/316	36/15514	0.0059529517710279	0.239668130057255	0.216323139479402	ACTC1/MYH1/MYL4/MYL6B	4
BP	positive regulation of cell killing	5/316	57/15514	0.00598607723898871	0.239668130057255	0.216323139479402	CCL2/FCER2/FOXO1/POMC/PRF1	5
BP	regulation of cellular response to growth factor stimulus	15/316	354/15514	0.00616190803087592	0.24202771136185	0.21845288462134	ADAMTS3/ASPN/CEMIP2/CREB3L1/FBN1/FBN2/FGF10/HTRA4/IRX1/ITGA8/NEPN/PRKCB/SFRP4/SULF2/WNT4	15
BP	regulation of tumor necrosis factor production	8/316	134/15514	0.00616556487783528	0.24202771136185	0.21845288462134	ARG2/ARHGEF2/BPI/CCL2/IFIH1/POMC/PTAFR/TLR9	8
BP	regulation of wound healing	9/316	163/15514	0.0062512484715469	0.24202771136185	0.21845288462134	ANXA1/ARHGEF2/CCL2/CXCR4/GP5/PDPN/PRKCB/TFPI/WNT4	9
BP	extracellular negative regulation of signal transduction	3/316	19/15514	0.00636778333890817	0.24202771136185	0.21845288462134	FBN1/FBN2/IGSF1	3
BP	extracellular regulation of signal transduction	3/316	19/15514	0.00636778333890817	0.24202771136185	0.21845288462134	FBN1/FBN2/IGSF1	3
BP	determination of digestive tract left/right asymmetry	3/316	19/15514	0.00636778333890817	0.24202771136185	0.21845288462134	MYO1G/PITX2/ZIC3	3
BP	carbohydrate homeostasis	12/316	256/15514	0.00638210891925674	0.24202771136185	0.21845288462134	AQP4/CCL2/FBN1/FOXO1/GCGR/MLXIP/MLXIPL/NPTX1/OAS1X/OAS1Y/OAS1Z/POMC	12
BP	cellular response to dexamethasone stimulus	5/316	58/15514	0.00644405463401175	0.24202771136185	0.21845288462134	ARG2/CACNA1G/CCL2/ELN/FOXO1	5
BP	striated muscle tissue development	15/316	356/15514	0.00647848892483838	0.24202771136185	0.21845288462134	ACTC1/ATF3/BTG2/CEMIP2/CRHR2/ELN/FHL2/HEYL/KIF5C/MYL6B/PITX1/PITX2/RCAN1/TBX1/XIRP1	15
BP	embryonic skeletal system development	9/316	164/15514	0.00649952351638395	0.24202771136185	0.21845288462134	HOXB2/HOXB3/HOXB5/HOXB6/IRX5/PITX2/SULF2/TBX1/WNT4	9
BP	actin filament-based movement	8/316	136/15514	0.00672649916822064	0.248406726920309	0.22421054907203	ACTC1/CACNA1G/MYH1/MYL4/MYL6B/MYO1B/PDPN/SCN3B	8
BP	regulation of tumor necrosis factor superfamily cytokine production	8/316	137/15514	0.00702104596766084	0.248406726920309	0.22421054907203	ARG2/ARHGEF2/BPI/CCL2/IFIH1/POMC/PTAFR/TLR9	8
BP	negative regulation of transmembrane receptor protein serine/threonine kinase signaling pathway	8/316	137/15514	0.00702104596766084	0.248406726920309	0.22421054907203	ASPN/CCN3/FBN1/FBN2/HTRA4/IGSF1/IRX1/NEPN	8
BP	actin-myosin filament sliding	4/316	38/15514	0.00722673284892897	0.248406726920309	0.22421054907203	ACTC1/MYH1/MYL4/MYL6B	4
BP	negative regulation of cell activation	10/316	197/15514	0.00723102189927074	0.248406726920309	0.22421054907203	ANXA1/ARG2/BANK1/BOLA-DQA5/BPI/CD37/GP5/INHA/PAWR/RUNX1	10
BP	response to dexamethasone	6/316	84/15514	0.00732515884522154	0.248406726920309	0.22421054907203	ARG2/CACNA1G/CCL2/ELN/FOXO1/PTAFR	6
BP	positive regulation of nitric-oxide synthase biosynthetic process	3/316	20/15514	0.00737994634471563	0.248406726920309	0.22421054907203	CCL2/FCER2/TLR9	3
BP	regulation of killing of cells of other organism	3/316	20/15514	0.00737994634471563	0.248406726920309	0.22421054907203	FCER2/POMC/PRF1	3
BP	positive regulation of cellular extravasation	3/316	20/15514	0.00737994634471563	0.248406726920309	0.22421054907203	CCL2/PAWR/PTAFR	3
BP	positive regulation of glycolytic process	3/316	20/15514	0.00737994634471563	0.248406726920309	0.22421054907203	ESRRB/MLXIPL/PFKFB3	3
BP	preganglionic parasympathetic fiber development	3/316	20/15514	0.00737994634471563	0.248406726920309	0.22421054907203	HOXB2/SEMA3A/TBX1	3
BP	chemokine-mediated signaling pathway	5/316	60/15514	0.00743271227812473	0.248406726920309	0.22421054907203	ACKR4/CCL1/CCL2/CCL21/CXCR4	5
BP	striated muscle cell differentiation	15/316	364/15514	0.00787816292328194	0.248406726920309	0.22421054907203	ACTC1/BARX2/CACNA2D2/FHL2/ITGA8/ITGB2/KIF5C/KRT8/MYH7B/MYMK/MYMX/PITX2/RCAN1/TBX1/XIRP1	15
BP	response to pain	4/316	39/15514	0.00792601261848393	0.248406726920309	0.22421054907203	PRKCB/PRKCG/RUNX1/THBS4	4
BP	negative regulation of leukocyte migration	4/316	39/15514	0.00792601261848393	0.248406726920309	0.22421054907203	CCL2/CCL21/CCN3/PADI2	4
BP	positive regulation of cAMP-mediated signaling	4/316	39/15514	0.00792601261848393	0.248406726920309	0.22421054907203	CRHR2/GPR62/PRKCB/RXFP2	4
BP	nephron epithelium development	7/316	112/15514	0.00798247090865328	0.248406726920309	0.22421054907203	HEYL/IRX1/IRX2/IRX3/SIM1/WNK4/WNT4	7
BP	adaptation of rhodopsin mediated signaling	2/316	7/15514	0.00811695220359318	0.248406726920309	0.22421054907203	PRKCB/PRKCG	2
BP	cellular response to interleukin-3	2/316	7/15514	0.00811695220359318	0.248406726920309	0.22421054907203	MT1E/MT2A	2
BP	hematopoietic stem cell migration	2/316	7/15514	0.00811695220359318	0.248406726920309	0.22421054907203	CXCR4/GPLD1	2
BP	regulation of amyloid precursor protein biosynthetic process	2/316	7/15514	0.00811695220359318	0.248406726920309	0.22421054907203	ITM2C/PAWR	2
MF	inhibin binding	2/316	7/15514	0.00811695220359318	0.248406726920309	0.22421054907203	IGSF1/INHA	2
MF	laminin-1 binding	2/316	7/15514	0.00811695220359318	0.248406726920309	0.22421054907203	NID1/THBS4	2
BP	light adaption	2/316	7/15514	0.00811695220359318	0.248406726920309	0.22421054907203	PRKCB/PRKCG	2
BP	positive regulation of vascular endothelial growth factor signaling pathway	2/316	7/15514	0.00811695220359318	0.248406726920309	0.22421054907203	ADAMTS3/CEMIP2	2
BP	regulation of lymphocyte anergy	2/316	7/15514	0.00811695220359318	0.248406726920309	0.22421054907203	CD3E/RUNX1	2
BP	regulation of T cell anergy	2/316	7/15514	0.00811695220359318	0.248406726920309	0.22421054907203	CD3E/RUNX1	2
BP	response to interleukin-3	2/316	7/15514	0.00811695220359318	0.248406726920309	0.22421054907203	MT1E/MT2A	2
BP	SA node cell action potential	2/316	7/15514	0.00811695220359318	0.248406726920309	0.22421054907203	CACNA1G/SCN3B	2
BP	SA node cell to atrial cardiac muscle cell signaling	2/316	7/15514	0.00811695220359318	0.248406726920309	0.22421054907203	CACNA1G/SCN3B	2
BP	smooth muscle cell proliferation	2/316	7/15514	0.00811695220359318	0.248406726920309	0.22421054907203	CCN3/FOXO1	2
BP	positive regulation of carbohydrate metabolic process	6/316	86/15514	0.00819283856512332	0.24929637348161	0.225013539178064	ESRRB/FOXO1/GPLD1/MLXIPL/PFKFB3/PTAFR	6
BP	diencephalon development	7/316	113/15514	0.00836559443667676	0.251796941816549	0.2272705384402	CRHR2/FGF10/PITX1/PITX2/SEMA3A/SIM1/WNT4	7
BP	nephron tubule formation	3/316	21/15514	0.00848185293157814	0.251796941816549	0.2272705384402	IRX1/IRX2/IRX3	3
BP	positive regulation of nucleotide catabolic process	3/316	21/15514	0.00848185293157814	0.251796941816549	0.2272705384402	ESRRB/MLXIPL/PFKFB3	3
BP	plasma lipoprotein particle	3/316	21/15514	0.00848185293157814	0.251796941816549	0.2272705384402	APOL3/PLTP/PON1	3
BP	mesenchyme development	12/316	266/15514	0.00854189156638913	0.251796941816549	0.2272705384402	ACTC1/CEMIP2/FGF10/HEYL/IRX1/LGR6/LOXL2/PITX2/SEMA3A/TBX1/WNT4/ZIC3	12
BP	muscle cell differentiation	17/316	438/15514	0.00858500507556428	0.251796941816549	0.2272705384402	ACTC1/BARX2/CACNA2D2/FGF10/FHL2/ITGA8/ITGB2/KIF5C/KRT8/MYH7B/MYMK/MYMX/PITX2/RCAN1/TBX1/WNT4/XIRP1	17
BP	regulation of cell killing	6/316	87/15514	0.00865330335256873	0.251796941816549	0.2272705384402	CCL2/FCER2/FOXO1/POMC/PRF1/RIPK3	6
BP	tissue regeneration	6/316	87/15514	0.00865330335256873	0.251796941816549	0.2272705384402	ANXA1/CCN3/FGF10/LGR6/MYMK/WNT4	6
BP	actin-mediated cell contraction	7/316	114/15514	0.00876208363916037	0.253576605318092	0.228876852954269	ACTC1/CACNA1G/MYH1/MYL4/MYL6B/PDPN/SCN3B	7
BP	monocarboxylic acid transport	8/316	144/15514	0.00936367927583071	0.265878154686796	0.23998016393376	ANXA1/FABP3/SLC16A12/SLC16A13/SLC16A7/SLC16A9/SLC27A6/SLC6A1	8
BP	negative regulation of cellular response to growth factor stimulus	9/316	174/15514	0.00941951577303606	0.265878154686796	0.23998016393376	ASPN/CREB3L1/FBN1/FBN2/HTRA4/IRX1/NEPN/SULF2/WNT4	9
BP	negative regulation of leukocyte activation	9/316	174/15514	0.00941951577303606	0.265878154686796	0.23998016393376	ANXA1/ARG2/BANK1/BOLA-DQA5/BPI/CD37/INHA/PAWR/RUNX1	9
BP	regulation of calcium ion import	4/316	41/15514	0.00945457675743473	0.265878154686796	0.23998016393376	CCL2/CRHR2/CXCR4/PAWR	4
BP	tissue remodeling	7/316	116/15514	0.00959621419758377	0.265878154686796	0.23998016393376	ANXA1/ELN/FGF10/LGR6/RASSF2/SFRP4/TBX1	7
BP	response to vitamin	8/316	145/15514	0.00974077438595175	0.265878154686796	0.23998016393376	ARG2/CCL2/CCND1/ELN/PAWR/PITX2/POSTN/PRKCB	8
BP	nucleotide biosynthetic process	12/316	271/15514	0.00981692637048191	0.265878154686796	0.23998016393376	ACSS1/ADCY1/ADCY7/NT5E/OAS1X/OAS1Y/OAS1Z/PARP10/PFKFB3/PRKAG3/SCD5/SLC25A1	12
BP	regulation of cAMP-mediated signaling	5/316	65/15514	0.0103569305000868	0.265878154686796	0.23998016393376	CRHR2/GPR62/PRKCB/RASD2/RXFP2	5
BP	nerve development	7/316	118/15514	0.0104869632565727	0.265878154686796	0.23998016393376	HOXB2/HOXB3/NPTX1/PRKCG/SEMA3A/SULF2/TBX1	7
BP	positive regulation of GTPase activity	15/316	377/15514	0.0106578623448543	0.265878154686796	0.23998016393376	ALDH1A1/ARHGAP15/ARHGAP30/CCL1/CCL2/CCL21/PLEKHG5/RASGRP3/RGS1/RGS14/RGSL1/SRGAP1/STK26/TBC1D1/WNT4	15
BP	carbon dioxide transport	2/316	8/15514	0.0106777735583413	0.265878154686796	0.23998016393376	AQP4/CA4	2
BP	cellular response to erythropoietin	2/316	8/15514	0.0106777735583413	0.265878154686796	0.23998016393376	MT1E/MT2A	2
BP	bone trabecula formation	2/316	8/15514	0.0106777735583413	0.265878154686796	0.23998016393376	FBN2/THBS3	2
BP	determination of left/right asymmetry in nervous system	2/316	8/15514	0.0106777735583413	0.265878154686796	0.23998016393376	PITX2/ZIC3	2
BP	positive regulation of leukocyte adhesion to vascular endothelial cell	2/316	8/15514	0.0106777735583413	0.265878154686796	0.23998016393376	PAWR/PTAFR	2
BP	regulation of neutrophil degranulation	2/316	8/15514	0.0106777735583413	0.265878154686796	0.23998016393376	ITGB2/PTAFR	2
BP	myeloid progenitor cell differentiation	2/316	8/15514	0.0106777735583413	0.265878154686796	0.23998016393376	MLF1/RUNX1	2
BP	SA node cell to atrial cardiac muscle cell communication	2/316	8/15514	0.0106777735583413	0.265878154686796	0.23998016393376	CACNA1G/SCN3B	2
BP	nucleoside phosphate biosynthetic process	12/316	275/15514	0.0109395785421909	0.265878154686796	0.23998016393376	ACSS1/ADCY1/ADCY7/NT5E/OAS1X/OAS1Y/OAS1Z/PARP10/PFKFB3/PRKAG3/SCD5/SLC25A1	12
BP	response to fatty acid	7/316	119/15514	0.0109542211971693	0.265878154686796	0.23998016393376	AANAT/CCL2/CCL21/FABP3/PON1/PTAFR/ZNF683	7
BP	parasympathetic nervous system development	3/316	23/15514	0.0109612459329484	0.265878154686796	0.23998016393376	HOXB2/SEMA3A/TBX1	3
BP	response to interferon-alpha	3/316	23/15514	0.0109612459329484	0.265878154686796	0.23998016393376	OAS1X/OAS1Y/OAS1Z	3
BP	regulation of macrophage differentiation	3/316	23/15514	0.0109612459329484	0.265878154686796	0.23998016393376	C1QA/INHA/PRKCB	3
BP	midgut development	5/316	66/15514	0.0110240620311748	0.265878154686796	0.23998016393376	ALDH1A1/ARG2/ITGA8/ITGB2/MYH7B	5
BP	response to exogenous dsRNA	4/316	43/15514	0.011162973546439	0.265878154686796	0.23998016393376	IFIH1/IFIT1/MX1/STING1	4
BP	actin filament organization	12/316	276/15514	0.0112351597163426	0.265878154686796	0.23998016393376	ACTC1/ARHGEF2/CRHR2/DPYSL3/ELN/ITGB2/KIF5C/MICAL2/MYO1B/NAV2/PAWR/RFLNA	12
BP	striated muscle cell development	11/316	245/15514	0.0119394097537354	0.265878154686796	0.23998016393376	ACTC1/CACNA2D2/FHL2/ITGA8/ITGB2/KIF5C/KRT8/MYH7B/PITX2/RCAN1/XIRP1	11
BP	negative regulation of chemotaxis	4/316	44/15514	0.0120868871380272	0.265878154686796	0.23998016393376	CCL2/CCN3/PADI2/SEMA3A	4
BP	smooth muscle cell differentiation	4/316	44/15514	0.0120868871380272	0.265878154686796	0.23998016393376	FGF10/ITGA8/PITX2/WNT4	4
BP	carboxylic acid transmembrane transporter activity	8/316	151/15514	0.0122450058642683	0.265878154686796	0.23998016393376	SLC16A12/SLC16A13/SLC16A7/SLC16A9/SLC25A1/SLC27A6/SLC6A1/SLC7A8	8
BP	kidney epithelium development	8/316	151/15514	0.0122450058642683	0.265878154686796	0.23998016393376	ARG2/HEYL/IRX1/IRX2/IRX3/SIM1/WNK4/WNT4	8
MF	organic acid transmembrane transporter activity	8/316	151/15514	0.0122450058642683	0.265878154686796	0.23998016393376	SLC16A12/SLC16A13/SLC16A7/SLC16A9/SLC25A1/SLC27A6/SLC6A1/SLC7A8	8
BP	detection of temperature stimulus involved in sensory perception of pain	3/316	24/15514	0.0123413718684227	0.265878154686796	0.23998016393376	ANO1/CXCR4/PAWR	3
BP	cellular response to glucagon stimulus	3/316	24/15514	0.0123413718684227	0.265878154686796	0.23998016393376	ADCY1/ADCY7/GCGR	3
BP	regulation of nitric-oxide synthase biosynthetic process	3/316	24/15514	0.0123413718684227	0.265878154686796	0.23998016393376	CCL2/FCER2/TLR9	3
BP	regulation of nuclease activity	3/316	24/15514	0.0123413718684227	0.265878154686796	0.23998016393376	OAS1X/OAS1Y/OAS1Z	3
BP	response to vitamin E	3/316	24/15514	0.0123413718684227	0.265878154686796	0.23998016393376	ARG2/CCND1/PAWR	3
CC	protein-lipid complex	3/316	24/15514	0.0123413718684227	0.265878154686796	0.23998016393376	APOL3/PLTP/PON1	3
BP	negative regulation of cell cycle arrest	3/316	24/15514	0.0123413718684227	0.265878154686796	0.23998016393376	CCND1/FGF10/MLXIPL	3
BP	striated muscle contraction	7/316	122/15514	0.0124466212241156	0.265878154686796	0.23998016393376	ACTC1/ARG2/CACNA1G/CHRNG/CXCR4/MYL4/SCN3B	7
BP	tissue migration	13/316	315/15514	0.0127515423151779	0.265878154686796	0.23998016393376	ACTC1/CCN3/CXCR4/FGF10/GMFG/GPLD1/ITGA8/ITGB2/LGR6/LOXL2/MYH7B/PLEKHG5/PRSS2	13
BP	glucose metabolic process	7/316	123/15514	0.0129751457529164	0.265878154686796	0.23998016393376	ATF3/DCXR/FBN1/OAS1X/OAS1Y/OAS1Z/SLC25A1	7
BP	kidney morphogenesis	6/316	95/15514	0.0130257494738943	0.265878154686796	0.23998016393376	FGF10/IRX1/IRX2/IRX3/WNK4/WNT4	6
MF	anion transmembrane transporter activity	13/316	316/15514	0.0130632390953228	0.265878154686796	0.23998016393376	ANO1/APOL3/SLC16A12/SLC16A13/SLC16A7/SLC16A9/SLC22A17/SLC22A18/SLC25A1/SLC27A6/SLC6A1/SLC7A8/SLCO4A1	13
BP	complement activation, classical pathway	2/316	9/15514	0.0135451611518137	0.265878154686796	0.23998016393376	C1QA/C1QB	2
BP	facial nerve structural organization	2/316	9/15514	0.0135451611518137	0.265878154686796	0.23998016393376	HOXB2/SEMA3A	2
BP	ethanol oxidation	2/316	9/15514	0.0135451611518137	0.265878154686796	0.23998016393376	ACSS1/ALDH1A1	2
BP	response to fluoride	2/316	9/15514	0.0135451611518137	0.265878154686796	0.23998016393376	FOXO1/PON1	2
BP	response to UV-A	2/316	9/15514	0.0135451611518137	0.265878154686796	0.23998016393376	AANAT/CCND1	2
BP	heparan sulfate proteoglycan biosynthetic process, enzymatic modification	2/316	9/15514	0.0135451611518137	0.265878154686796	0.23998016393376	HS3ST5/SULF2	2
BP	high-density lipoprotein particle binding	2/316	9/15514	0.0135451611518137	0.265878154686796	0.23998016393376	APOL3/PON1	2
BP	MHC class II protein complex	2/316	9/15514	0.0135451611518137	0.265878154686796	0.23998016393376	BOLA-DOB/BOLA-DQA5	2
BP	MHC protein complex	2/316	9/15514	0.0135451611518137	0.265878154686796	0.23998016393376	BOLA-DOB/BOLA-DQA5	2
BP	negative regulation of calcium ion import	2/316	9/15514	0.0135451611518137	0.265878154686796	0.23998016393376	CRHR2/PAWR	2
BP	negative regulation of macrophage differentiation	2/316	9/15514	0.0135451611518137	0.265878154686796	0.23998016393376	C1QA/INHA	2
BP	neural crest cell fate commitment	2/316	9/15514	0.0135451611518137	0.265878154686796	0.23998016393376	IRX1/ZIC3	2
BP	positive regulation of isomerase activity	2/316	9/15514	0.0135451611518137	0.265878154686796	0.23998016393376	ITGB2/UHRF1	2
BP	pronephric nephron tubule development	2/316	9/15514	0.0135451611518137	0.265878154686796	0.23998016393376	IRX1/SIM1	2
BP	regulation of isomerase activity	2/316	9/15514	0.0135451611518137	0.265878154686796	0.23998016393376	ITGB2/UHRF1	2
BP	cellular response to steroid hormone stimulus	10/316	217/15514	0.0136723446165369	0.265878154686796	0.23998016393376	ANXA1/ARG2/CACNA1G/CCL2/CRHR2/ELN/FHL2/FOXO1/PADI2/TFPI	10
BP	liver development	10/316	217/15514	0.0136723446165369	0.265878154686796	0.23998016393376	ALDH1A1/ANXA1/BDH1/CCND1/MKI67/RUNX1/SULF2/UHRF1/WNT4/ZIC3	10
MF	actin binding	14/316	353/15514	0.0137166324316083	0.265878154686796	0.23998016393376	ABLIM1/ACTC1/CXCR4/GAS2L2/GAS2L3/MICAL2/MYL4/MYO1B/MYO1G/NAV2/PAWR/PDLIM4/TAGLN/XIRP1	14
BP	detection of temperature stimulus involved in sensory perception	3/316	25/15514	0.0138165409268904	0.265878154686796	0.23998016393376	ANO1/CXCR4/PAWR	3
BP	copper ion homeostasis	3/316	25/15514	0.0138165409268904	0.265878154686796	0.23998016393376	MT1E/MT2A/PRND	3
BP	muscle cell migration	3/316	25/15514	0.0138165409268904	0.265878154686796	0.23998016393376	ANXA1/CCN3/THBS4	3
BP	regulation of monocyte chemotaxis	3/316	25/15514	0.0138165409268904	0.265878154686796	0.23998016393376	CCL1/CCL2/CCN3	3
BP	nephron tubule morphogenesis	5/316	70/15514	0.0139853503159442	0.265878154686796	0.23998016393376	IRX1/IRX2/IRX3/WNK4/WNT4	5
BP	branching involved in blood vessel morphogenesis	4/316	46/15514	0.0140783269256806	0.265878154686796	0.23998016393376	CXCR4/PITX2/SEMA3A/TBX1	4
BP	mesodermal cell migration	4/316	46/15514	0.0140783269256806	0.265878154686796	0.23998016393376	CXCR4/KIF26A/NAV2/UNC5A	4
BP	response to iron ion	4/316	46/15514	0.0140783269256806	0.265878154686796	0.23998016393376	C1QA/CCND1/GPLD1/PAWR	4
BP	response to carbohydrate	11/316	251/15514	0.0140902102669475	0.265878154686796	0.23998016393376	AQP4/ARG2/CCL2/ELN/GPLD1/LPL/MLXIP/MLXIPL/NPTX1/PRKCB/SLC6A1	11
BP	regulation of carbohydrate metabolic process	9/316	187/15514	0.0145802106987659	0.265878154686796	0.23998016393376	ESRRB/FOXO1/GCGR/GPLD1/MLXIP/MLXIPL/PFKFB3/POMC/PTAFR	9
BP	myotube differentiation	7/316	126/15514	0.0146574035243871	0.265878154686796	0.23998016393376	ACTC1/BARX2/KIF5C/MYMK/MYMX/PITX2/RCAN1	7
BP	actin filament binding	8/316	156/15514	0.0146692805771234	0.265878154686796	0.23998016393376	ABLIM1/GAS2L2/MYL4/MYO1B/MYO1G/NAV2/PDLIM4/TAGLN	8
BP	embryonic organ morphogenesis	16/316	428/15514	0.0147164124890738	0.265878154686796	0.23998016393376	ALDH1A1/CEMIP2/FBN1/FBN2/FGF10/HOXB2/HOXB3/HOXB5/HOXB6/IRX5/ITGA8/MICAL2/PITX2/TBX1/WNT4/ZIC3	16
BP	lymphocyte activation	15/316	392/15514	0.0147682393623352	0.265878154686796	0.23998016393376	ANXA1/BANK1/CCL21/CD3E/CD6/CLCF1/CXCR4/IL2RB/ITGB2/PRF1/PRKCB/RIPK3/RSAD2/WNT4/ZNF683	15
BP	granulocyte chemotaxis	5/316	71/15514	0.0148014603502143	0.265878154686796	0.23998016393376	ANXA1/CCL1/CCL2/CCL21/ITGB2	5
BP	negative regulation of interleukin-6 production	4/316	47/15514	0.0151473961035013	0.265878154686796	0.23998016393376	AQP4/BANK1/BPI/TLR9	4
BP	regulation of glycoprotein metabolic process	4/316	47/15514	0.0151473961035013	0.265878154686796	0.23998016393376	CCL21/ITM2C/PAWR/PTX3	4
BP	hepaticobiliary system development	10/316	221/15514	0.0153597253323005	0.265878154686796	0.23998016393376	ALDH1A1/ANXA1/BDH1/CCND1/MKI67/RUNX1/SULF2/UHRF1/WNT4/ZIC3	10
BP	regulation of lymphocyte proliferation	10/316	221/15514	0.0153597253323005	0.265878154686796	0.23998016393376	ANXA1/ARG2/BOLA-DQA5/CD3E/CD6/CLCF1/FGF10/PAWR/RIPK3/TLR9	10
BP	trabecula formation	3/316	26/15514	0.0153875833238304	0.265878154686796	0.23998016393376	FBN2/FHL2/THBS3	3
CC	muscle tendon junction	3/316	26/15514	0.0153875833238304	0.265878154686796	0.23998016393376	ITGB2/THBS3/THBS4	3
BP	nephron epithelium morphogenesis	5/316	72/15514	0.0156488768677098	0.265878154686796	0.23998016393376	IRX1/IRX2/IRX3/WNK4/WNT4	5
BP	positive regulation of ATPase activity	5/316	72/15514	0.0156488768677098	0.265878154686796	0.23998016393376	ACTC1/DYNC1I1/FGF10/MYL4/UHRF1	5
BP	regulation of transmembrane receptor protein serine/threonine kinase signaling pathway	12/316	289/15514	0.0156647055964427	0.265878154686796	0.23998016393376	ASPN/CCN3/FBN1/FBN2/FGF10/HTRA4/IGSF1/INHA/IRX1/ITGA8/NEPN/SFRP4	12
BP	epithelial to mesenchymal transition	6/316	99/15514	0.0157087725107645	0.265878154686796	0.23998016393376	HEYL/IRX1/LGR6/LOXL2/WNT4/ZIC3	6
BP	regulation of ERK1 and ERK2 cascade	12/316	290/15514	0.0160534196852878	0.265878154686796	0.23998016393376	ARHGEF2/ATF3/CCL1/CCL2/CCL21/CHI3L1/CLCF1/CRHR2/FGF10/HCRTR1/PRKCB/RGS14	12
BP	regulation of chemotaxis	12/316	290/15514	0.0160534196852878	0.265878154686796	0.23998016393376	CCL1/CCL2/CCL21/CCN3/CXCR4/FGF10/GRK3/NAV2/PADI2/SEMA3A/THBS4/WNT4	12
BP	regulation of mononuclear cell proliferation	10/316	223/15514	0.0162593977630273	0.265878154686796	0.23998016393376	ANXA1/ARG2/BOLA-DQA5/CD3E/CD6/CLCF1/FGF10/PAWR/RIPK3/TLR9	10
BP	regulation of mononuclear cell migration	4/316	48/15514	0.0162663207632227	0.265878154686796	0.23998016393376	CCL1/CCL2/CCL21/CCN3	4
BP	regulation of ATPase activity	6/316	100/15514	0.0164350194952251	0.265878154686796	0.23998016393376	ACTC1/DYNC1I1/FGF10/MYL4/TLR9/UHRF1	6
BP	nephron morphogenesis	5/316	73/15514	0.016528070616889	0.265878154686796	0.23998016393376	IRX1/IRX2/IRX3/WNK4/WNT4	5
BP	regulation of lymphocyte activation	16/316	434/15514	0.0165678811168271	0.265878154686796	0.23998016393376	ANXA1/ARG2/BANK1/BOLA-DQA5/CCL2/CCL21/CD3E/CD6/CLCF1/FGF10/INHA/PAWR/RIPK3/RUNX1/TLR9/ZNF683	16
BP	axonogenesis involved in innervation	2/316	10/15514	0.0167056445796752	0.265878154686796	0.23998016393376	NPTX1/SEMA3A	2
BP	endothelial cell chemotaxis	2/316	10/15514	0.0167056445796752	0.265878154686796	0.23998016393376	CCN3/PLEKHG5	2
BP	negative regulation of granulocyte differentiation	2/316	10/15514	0.0167056445796752	0.265878154686796	0.23998016393376	C1QA/RUNX1	2
BP	protein localization to extracellular region	2/316	10/15514	0.0167056445796752	0.265878154686796	0.23998016393376	FBN1/FBN2	2
BP	regulation of motor neuron migration	2/316	10/15514	0.0167056445796752	0.265878154686796	0.23998016393376	KIF26A/WNT4	2
MF	adenylate cyclase activity	2/316	10/15514	0.0167056445796752	0.265878154686796	0.23998016393376	ADCY1/ADCY7	2
BP	habenula development	2/316	10/15514	0.0167056445796752	0.265878154686796	0.23998016393376	PITX2/WNT4	2
BP	negative regulation by host of viral process	2/316	10/15514	0.0167056445796752	0.265878154686796	0.23998016393376	PTGDS/PTX3	2
BP	regulation of T cell tolerance induction	2/316	10/15514	0.0167056445796752	0.265878154686796	0.23998016393376	CD3E/RUNX1	2
BP	renal tubule development	8/316	160/15514	0.0168463880261913	0.265878154686796	0.23998016393376	HEYL/IRX1/IRX2/IRX3/MYH7B/SIM1/WNK4/WNT4	8
BP	cell aggregation	3/316	27/15514	0.0170551506278524	0.265878154686796	0.23998016393376	BARX2/MPZ/OTOR	3
MF	adenylyltransferase activity	3/316	27/15514	0.0170551506278524	0.265878154686796	0.23998016393376	OAS1X/OAS1Y/OAS1Z	3
BP	response to light intensity	3/316	27/15514	0.0170551506278524	0.265878154686796	0.23998016393376	MT1E/PRKCB/PRKCG	3
BP	response to sucrose	3/316	27/15514	0.0170551506278524	0.265878154686796	0.23998016393376	MLXIP/MLXIPL/SLC6A1	3
BP	actin filament bundle assembly	5/316	74/15514	0.017439497567001	0.265878154686796	0.23998016393376	ACTC1/DPYSL3/ELN/MYO1B/PAWR	5
BP	disruption of cells of other organism	5/316	74/15514	0.017439497567001	0.265878154686796	0.23998016393376	APOL3/CCL1/CCL2/CCL21/POMC	5
BP	killing of cells of other organism	5/316	74/15514	0.017439497567001	0.265878154686796	0.23998016393376	APOL3/CCL1/CCL2/CCL21/POMC	5
BP	muscle cell development	11/316	260/15514	0.0178497364487586	0.265878154686796	0.23998016393376	ACTC1/CACNA2D2/FHL2/ITGA8/ITGB2/KIF5C/KRT8/MYH7B/PITX2/RCAN1/XIRP1	11
BP	cell killing	6/316	102/15514	0.0179563752957438	0.265878154686796	0.23998016393376	APOL3/CCL1/CCL2/CCL21/POMC/PRF1	6
BP	hexose metabolic process	8/316	162/15514	0.018018177064099	0.265878154686796	0.23998016393376	ALDH1A1/ATF3/DCXR/FBN1/OAS1X/OAS1Y/OAS1Z/SLC25A1	8
BP	positive regulation of immune effector process	10/316	227/15514	0.0181753215277995	0.265878154686796	0.23998016393376	ANXA1/CCL2/CD37/CLCF1/FCER2/ITGB2/POMC/PTAFR/RSAD2/TLR9	10
BP	segment specification	4/316	50/15514	0.018656341908035	0.265878154686796	0.23998016393376	HOXB2/IRX1/IRX2/IRX3	4
BP	negative regulation of fibroblast growth factor receptor signaling pathway	3/316	28/15514	0.0188197247592485	0.265878154686796	0.23998016393376	CREB3L1/SULF2/WNT4	3
BP	response to disaccharide	3/316	28/15514	0.0188197247592485	0.265878154686796	0.23998016393376	MLXIP/MLXIPL/SLC6A1	3
BP	actomyosin structure organization	9/316	196/15514	0.0192115616639557	0.265878154686796	0.23998016393376	ACTC1/ELN/EPB41L3/ITGA8/ITGB2/KRT8/MYH7B/SHCBP1/XIRP1	9
BP	negative regulation of transforming growth factor beta receptor signaling pathway	5/316	76/15514	0.0193607992247935	0.265878154686796	0.23998016393376	ASPN/FBN1/FBN2/HTRA4/NEPN	5
BP	positive regulation of cell adhesion	16/316	443/15514	0.0196768840506507	0.265878154686796	0.23998016393376	ANXA1/BOLA-DQA5/CCL2/CCL21/CD3E/CD6/COL8A1/ECM2/NID1/PAWR/PDPN/PRKCB/PRSS2/PTAFR/RUNX1/WNT4	16
BP	muscle contraction	11/316	264/15514	0.0197417788977185	0.265878154686796	0.23998016393376	ACTC1/ARG2/CACNA1G/CHRNG/CXCR4/MYH1/MYH7B/MYL4/MYL6B/SCN3B/SULF2	11
BP	epithalamus development	2/316	11/15514	0.0201461719897497	0.265878154686796	0.23998016393376	PITX2/WNT4	2
BP	conditioned taste aversion	2/316	11/15514	0.0201461719897497	0.265878154686796	0.23998016393376	ADCY1/FOSL2	2
BP	enamel mineralization	2/316	11/15514	0.0201461719897497	0.265878154686796	0.23998016393376	FOXO1/TBX1	2
BP	glomerular basement membrane development	2/316	11/15514	0.0201461719897497	0.265878154686796	0.23998016393376	NID1/SULF2	2
BP	regulation of neutrophil activation	2/316	11/15514	0.0201461719897497	0.265878154686796	0.23998016393376	ITGB2/PTAFR	2
MF	hydrolase activity, acting on carbon-nitrogen (but not peptide) bonds, in linear amidines	2/316	11/15514	0.0201461719897497	0.265878154686796	0.23998016393376	ARG2/PADI2	2
BP	hypothalamus cell differentiation	2/316	11/15514	0.0201461719897497	0.265878154686796	0.23998016393376	SEMA3A/SIM1	2
BP	MAP kinase kinase kinase kinase activity	2/316	11/15514	0.0201461719897497	0.265878154686796	0.23998016393376	NRK/STK26	2
BP	negative regulation of glial cell apoptotic process	2/316	11/15514	0.0201461719897497	0.265878154686796	0.23998016393376	CCL2/PRKCB	2
BP	positive regulation of cell aging	2/316	11/15514	0.0201461719897497	0.265878154686796	0.23998016393376	ARG2/PAWR	2
BP	protein kinase C activity	2/316	11/15514	0.0201461719897497	0.265878154686796	0.23998016393376	PRKCB/PRKCG	2
BP	regulation of follicle-stimulating hormone secretion	2/316	11/15514	0.0201461719897497	0.265878154686796	0.23998016393376	CRHR2/INHA	2
BP	response to erythropoietin	2/316	11/15514	0.0201461719897497	0.265878154686796	0.23998016393376	MT1E/MT2A	2
BP	response to iron(II) ion	2/316	11/15514	0.0201461719897497	0.265878154686796	0.23998016393376	GPLD1/PAWR	2
BP	anion transmembrane transport	13/316	335/15514	0.0201743983992893	0.265878154686796	0.23998016393376	ANO1/APOL3/SLC16A12/SLC16A13/SLC16A7/SLC16A9/SLC22A17/SLC22A18/SLC25A1/SLC27A6/SLC6A1/SLC7A8/SLCO4A1	13
BP	(1->3)-beta-D-glucan binding	1/316	1/15514	0.0203686992393967	0.265878154686796	0.23998016393376	PTX3	1
BP	3,4-dihydrocoumarin hydrolase activity	1/316	1/15514	0.0203686992393967	0.265878154686796	0.23998016393376	PON3	1
BP	activin receptor antagonist activity	1/316	1/15514	0.0203686992393967	0.265878154686796	0.23998016393376	IGSF1	1
BP	AF-1 domain binding	1/316	1/15514	0.0203686992393967	0.265878154686796	0.23998016393376	HEYL	1
BP	auxin catabolic process	1/316	1/15514	0.0203686992393967	0.265878154686796	0.23998016393376	PON3	1
BP	auxin metabolic process	1/316	1/15514	0.0203686992393967	0.265878154686796	0.23998016393376	PON3	1
BP	collagen sheet	1/316	1/15514	0.0203686992393967	0.265878154686796	0.23998016393376	COL8A1	1
BP	corticotrophin-releasing factor receptor activity	1/316	1/15514	0.0203686992393967	0.265878154686796	0.23998016393376	CRHR2	1
BP	epidermal growth factor receptor signaling pathway via I-kappaB kinase/NF-kappaB cascade	1/316	1/15514	0.0203686992393967	0.265878154686796	0.23998016393376	RASSF2	1
BP	epidermal growth factor receptor signaling pathway via positive regulation of NF-kappaB transcription factor activity	1/316	1/15514	0.0203686992393967	0.265878154686796	0.23998016393376	RASSF2	1
BP	gametophyte development	1/316	1/15514	0.0203686992393967	0.265878154686796	0.23998016393376	MT1E	1
BP	bronchiole morphogenesis	1/316	1/15514	0.0203686992393967	0.265878154686796	0.23998016393376	FGF10	1
BP	cell gliding	1/316	1/15514	0.0203686992393967	0.265878154686796	0.23998016393376	MYO1G	1
BP	cell-cell signaling involved in lung development	1/316	1/15514	0.0203686992393967	0.265878154686796	0.23998016393376	FGF10	1
BP	cellular response to 2-O-acetyl-1-O-hexadecyl-sn-glycero-3-phosphocholine	1/316	1/15514	0.0203686992393967	0.265878154686796	0.23998016393376	PTAFR	1
BP	cellular response to triglyceride	1/316	1/15514	0.0203686992393967	0.265878154686796	0.23998016393376	GPLD1	1
BP	determination of left/right asymmetry in diencephalon	1/316	1/15514	0.0203686992393967	0.265878154686796	0.23998016393376	PITX2	1
BP	gamma-aminobutyric acid import	1/316	1/15514	0.0203686992393967	0.265878154686796	0.23998016393376	SLC6A1	1
BP	gastrin-induced gastric acid secretion	1/316	1/15514	0.0203686992393967	0.265878154686796	0.23998016393376	HRH2	1
BP	histamine-induced gastric acid secretion	1/316	1/15514	0.0203686992393967	0.265878154686796	0.23998016393376	HRH2	1
BP	immature T cell proliferation	1/316	1/15514	0.0203686992393967	0.265878154686796	0.23998016393376	WNT4	1
BP	immature T cell proliferation in thymus	1/316	1/15514	0.0203686992393967	0.265878154686796	0.23998016393376	WNT4	1
BP	lung pattern specification process	1/316	1/15514	0.0203686992393967	0.265878154686796	0.23998016393376	FGF10	1
BP	lung proximal/distal axis specification	1/316	1/15514	0.0203686992393967	0.265878154686796	0.23998016393376	FGF10	1
BP	maintenance of kidney identity	1/316	1/15514	0.0203686992393967	0.265878154686796	0.23998016393376	IRX1	1
BP	mesenchymal-epithelial cell signaling involved in lung development	1/316	1/15514	0.0203686992393967	0.265878154686796	0.23998016393376	FGF10	1
BP	negative regulation of activated CD8-positive, alpha-beta T cell apoptotic process	1/316	1/15514	0.0203686992393967	0.265878154686796	0.23998016393376	ARG2	1
BP	negative regulation of chemokine (C-C motif) ligand 4 production	1/316	1/15514	0.0203686992393967	0.265878154686796	0.23998016393376	ARG2	1
BP	negative regulation of podosome assembly	1/316	1/15514	0.0203686992393967	0.265878154686796	0.23998016393376	ARHGEF2	1
BP	negative regulation of testicular blood vessel morphogenesis	1/316	1/15514	0.0203686992393967	0.265878154686796	0.23998016393376	WNT4	1
BP	neural crest cell migration involved in sympathetic nervous system development	1/316	1/15514	0.0203686992393967	0.265878154686796	0.23998016393376	SEMA3A	1
BP	positive regulation of complement-dependent cytotoxicity	1/316	1/15514	0.0203686992393967	0.265878154686796	0.23998016393376	FOXO1	1
BP	positive regulation of glucocorticoid biosynthetic process	1/316	1/15514	0.0203686992393967	0.265878154686796	0.23998016393376	WNT4	1
BP	positive regulation of glucocorticoid metabolic process	1/316	1/15514	0.0203686992393967	0.265878154686796	0.23998016393376	WNT4	1
BP	positive regulation of maternal process involved in parturition	1/316	1/15514	0.0203686992393967	0.265878154686796	0.23998016393376	PTAFR	1
BP	positive regulation of transcytosis	1/316	1/15514	0.0203686992393967	0.265878154686796	0.23998016393376	PTAFR	1
BP	prolactin secreting cell differentiation	1/316	1/15514	0.0203686992393967	0.265878154686796	0.23998016393376	PITX2	1
BP	protein deamination	1/316	1/15514	0.0203686992393967	0.265878154686796	0.23998016393376	LOXL1	1
BP	proximal/distal pattern formation involved in pronephric nephron development	1/316	1/15514	0.0203686992393967	0.265878154686796	0.23998016393376	IRX1	1
BP	regulation of chemokine (C-C motif) ligand 4 production	1/316	1/15514	0.0203686992393967	0.265878154686796	0.23998016393376	ARG2	1
BP	regulation of maternal process involved in parturition	1/316	1/15514	0.0203686992393967	0.265878154686796	0.23998016393376	PTAFR	1
BP	regulation of transcytosis	1/316	1/15514	0.0203686992393967	0.265878154686796	0.23998016393376	PTAFR	1
BP	response to 2-O-acetyl-1-O-hexadecyl-sn-glycero-3-phosphocholine	1/316	1/15514	0.0203686992393967	0.265878154686796	0.23998016393376	PTAFR	1
BP	response to cyclosporin A	1/316	1/15514	0.0203686992393967	0.265878154686796	0.23998016393376	CCL2	1
BP	superior vena cava morphogenesis	1/316	1/15514	0.0203686992393967	0.265878154686796	0.23998016393376	PITX2	1
CC	collagen type VIII trimer	1/316	1/15514	0.0203686992393967	0.265878154686796	0.23998016393376	COL8A1	1
CC	matrix side of mitochondrial inner membrane	1/316	1/15514	0.0203686992393967	0.265878154686796	0.23998016393376	BDH1	1
CC	recycling endosome lumen	1/316	1/15514	0.0203686992393967	0.265878154686796	0.23998016393376	PDLIM4	1
CC	sheet-forming collagen trimer	1/316	1/15514	0.0203686992393967	0.265878154686796	0.23998016393376	COL8A1	1
CC	short-chain collagen trimer	1/316	1/15514	0.0203686992393967	0.265878154686796	0.23998016393376	COL8A1	1
CC	sperm end piece	1/316	1/15514	0.0203686992393967	0.265878154686796	0.23998016393376	CABYR	1
MF	all-trans-retinol 13,14-reductase activity	1/316	1/15514	0.0203686992393967	0.265878154686796	0.23998016393376	RETSAT	1
MF	aralkylamine N-acetyltransferase activity	1/316	1/15514	0.0203686992393967	0.265878154686796	0.23998016393376	AANAT	1
MF	aryldialkylphosphatase activity	1/316	1/15514	0.0203686992393967	0.265878154686796	0.23998016393376	PON1	1
MF	carbohydrate response element binding	1/316	1/15514	0.0203686992393967	0.265878154686796	0.23998016393376	MLXIPL	1
MF	corticotropin-releasing hormone receptor activity	1/316	1/15514	0.0203686992393967	0.265878154686796	0.23998016393376	CRHR2	1
MF	cyclic-di-GMP binding	1/316	1/15514	0.0203686992393967	0.265878154686796	0.23998016393376	STING1	1
MF	cyclic-GMP-AMP binding	1/316	1/15514	0.0203686992393967	0.265878154686796	0.23998016393376	STING1	1
MF	glycosylphosphatidylinositol phospholipase D activity	1/316	1/15514	0.0203686992393967	0.265878154686796	0.23998016393376	GPLD1	1
MF	nucleoside phosphotransferase activity	1/316	1/15514	0.0203686992393967	0.265878154686796	0.23998016393376	NT5C2	1
MF	pyruvate secondary active transmembrane transporter activity	1/316	1/15514	0.0203686992393967	0.265878154686796	0.23998016393376	SLC16A7	1
MF	sarcosine dehydrogenase activity	1/316	1/15514	0.0203686992393967	0.265878154686796	0.23998016393376	SARDH	1
BP	intracellular transport of viral protein in host cell	1/316	1/15514	0.0203686992393967	0.265878154686796	0.23998016393376	IFIT1	1
BP	invadopodium organization	1/316	1/15514	0.0203686992393967	0.265878154686796	0.23998016393376	PDPN	1
BP	ISG15 activating enzyme activity	1/316	1/15514	0.0203686992393967	0.265878154686796	0.23998016393376	UBA7	1
BP	L-xylulose reductase (NADP+) activity	1/316	1/15514	0.0203686992393967	0.265878154686796	0.23998016393376	DCXR	1
BP	mitochondrial citrate transmembrane transport	1/316	1/15514	0.0203686992393967	0.265878154686796	0.23998016393376	SLC25A1	1
BP	myoblast fusion involved in skeletal muscle regeneration	1/316	1/15514	0.0203686992393967	0.265878154686796	0.23998016393376	MYMK	1
BP	phenylacetate catabolic process	1/316	1/15514	0.0203686992393967	0.265878154686796	0.23998016393376	PON3	1
BP	pollen development	1/316	1/15514	0.0203686992393967	0.265878154686796	0.23998016393376	MT1E	1
BP	positive regulation of urothelial cell proliferation	1/316	1/15514	0.0203686992393967	0.265878154686796	0.23998016393376	FGF10	1
BP	prostaglandin production involved in inflammatory response	1/316	1/15514	0.0203686992393967	0.265878154686796	0.23998016393376	EPHX2	1
BP	regulation of urothelial cell proliferation	1/316	1/15514	0.0203686992393967	0.265878154686796	0.23998016393376	FGF10	1
BP	sarcosine catabolic process	1/316	1/15514	0.0203686992393967	0.265878154686796	0.23998016393376	SARDH	1
BP	specification of pronephric tubule identity	1/316	1/15514	0.0203686992393967	0.265878154686796	0.23998016393376	IRX1	1
BP	stilbene catabolic process	1/316	1/15514	0.0203686992393967	0.265878154686796	0.23998016393376	EPHX2	1
BP	stilbene metabolic process	1/316	1/15514	0.0203686992393967	0.265878154686796	0.23998016393376	EPHX2	1
BP	subthalamic nucleus development	1/316	1/15514	0.0203686992393967	0.265878154686796	0.23998016393376	PITX2	1
BP	symbiont intracellular protein transport in host	1/316	1/15514	0.0203686992393967	0.265878154686796	0.23998016393376	IFIT1	1
BP	T cell meandering migration	1/316	1/15514	0.0203686992393967	0.265878154686796	0.23998016393376	MYO1G	1
BP	tear secretion	1/316	1/15514	0.0203686992393967	0.265878154686796	0.23998016393376	FGF10	1
BP	urothelial cell proliferation	1/316	1/15514	0.0203686992393967	0.265878154686796	0.23998016393376	FGF10	1
BP	vitamin E biosynthetic process	1/316	1/15514	0.0203686992393967	0.265878154686796	0.23998016393376	PLTP	1
BP	cardiac muscle contraction	5/316	77/15514	0.0203715093168475	0.265878154686796	0.23998016393376	ACTC1/CACNA1G/CXCR4/MYL4/SCN3B	5
BP	maternal process involved in female pregnancy	5/316	77/15514	0.0203715093168475	0.265878154686796	0.23998016393376	APOL3/ARG2/CCL2/SFRP4/WNT4	5
BP	negative regulation of protein ubiquitination	5/316	77/15514	0.0203715093168475	0.265878154686796	0.23998016393376	ISG15/PARP10/PRKCB/PRKCG/RASD2	5
BP	positive regulation of wound healing	5/316	77/15514	0.0203715093168475	0.265878154686796	0.23998016393376	ANXA1/ARHGEF2/CCL2/CXCR4/PDPN	5
BP	motor neuron axon guidance	7/316	135/15514	0.0206307145677808	0.267305004722229	0.241268030948693	CXCR4/KIF5C/NAV2/OLFML2B/SEMA3A/SULF2/UNC5A	7
BP	activation of adenylate cyclase activity	3/316	29/15514	0.0206816266564429	0.267305004722229	0.241268030948693	ADCY1/ADCY7/RXFP2	3
BP	atrioventricular valve development	3/316	29/15514	0.0206816266564429	0.267305004722229	0.241268030948693	CEMIP2/HEYL/PITX2	3
BP	response to muscle activity	3/316	29/15514	0.0206816266564429	0.267305004722229	0.241268030948693	FNDC5/MYH1/PRKAG3	3
BP	regulation of leukocyte proliferation	10/316	232/15514	0.0207981775544883	0.268160521737651	0.242040215913836	ANXA1/ARG2/BOLA-DQA5/CD3E/CD6/CLCF1/FGF10/PAWR/RIPK3/TLR9	10
BP	autonomic nervous system development	4/316	52/15514	0.0212531640141295	0.272050717248172	0.24555148504179	HOXB2/KIF26A/SEMA3A/TBX1	4
BP	negative regulation of myeloid leukocyte differentiation	4/316	52/15514	0.0212531640141295	0.272050717248172	0.24555148504179	C1QA/FBN1/INHA/RUNX1	4
BP	ventral cord development	4/316	52/15514	0.0212531640141295	0.272050717248172	0.24555148504179	EMX2/ITGA8/ITGB2/SIM1	4
BP	negative regulation of cellular response to transforming growth factor beta stimulus	5/316	78/15514	0.0214161228770763	0.27282501033596	0.246250357735408	ASPN/FBN1/FBN2/HTRA4/NEPN	5
BP	positive regulation of tumor necrosis factor production	5/316	78/15514	0.0214161228770763	0.27282501033596	0.246250357735408	ARHGEF2/CCL2/IFIH1/PTAFR/TLR9	5
MF	DNA-binding transcription activator activity, RNA polymerase II-specific	16/316	448/15514	0.0215869513310011	0.274174642914016	0.247468528696891	ATF3/BARX2/CREB3L1/ESRRB/FOSL2/HEYL/HOXB2/HOXB3/HOXB5/MLXIP/PITX1/PITX2/RFX2/RUNX1/TBX1/ZIC3	16
CC	cell leading edge	15/316	411/15514	0.0216250422580069	0.274174642914016	0.247468528696891	ABLIM1/ACTC1/ARHGEF2/CXCR4/DPYSL3/GMFG/ITGA8/ITGB2/MYH7B/MYO1G/PDLIM4/PDPN/PLEKHG5/SSX2IP/UNC5A	15
BP	regulation of cell cycle arrest	6/316	107/15514	0.0221757137276485	0.280488540616932	0.253167418128374	BTG2/CCND1/FGF10/GTSE1/MLXIPL/ZNF385A	6
CC	myosin complex	4/316	53/15514	0.0226304266601728	0.28501999079481	0.257257480201454	MYH1/MYH7B/MYL6B/MYO1G	4
BP	lymph node development	3/316	30/15514	0.0226410246208835	0.28501999079481	0.257257480201454	CCL21/PDPN/RIPK3	3
BP	regulation of type I interferon production	6/316	108/15514	0.0230932067847435	0.289219196335564	0.261047660087608	IFIH1/ISG15/STING1/TLR9/UBA7/ZBP1	6
BP	positive regulation of cell activation	13/316	342/15514	0.0234197872539341	0.289219196335564	0.261047660087608	ANXA1/BOLA-DQA5/CCL2/CCL21/CD3E/CD6/CLCF1/FGF10/ITGB2/PDPN/PTAFR/RUNX1/TLR9	13
BP	positive regulation of tumor necrosis factor superfamily cytokine production	5/316	80/15514	0.0236085557542159	0.289219196335564	0.261047660087608	ARHGEF2/CCL2/IFIH1/PTAFR/TLR9	5
MF	integrin binding	7/316	139/15514	0.0237632889430394	0.289219196335564	0.261047660087608	CCN3/ECM2/FBN1/FCER2/FERMT3/TBC1D1/THBS4	7
BP	cranial nerve structural organization	2/316	12/15514	0.0238540987081129	0.289219196335564	0.261047660087608	HOXB2/SEMA3A	2
BP	diacylglycerol binding	2/316	12/15514	0.0238540987081129	0.289219196335564	0.261047660087608	PLTP/RASGRP3	2
BP	facial nerve morphogenesis	2/316	12/15514	0.0238540987081129	0.289219196335564	0.261047660087608	HOXB2/SEMA3A	2
BP	bone trabecula morphogenesis	2/316	12/15514	0.0238540987081129	0.289219196335564	0.261047660087608	FBN2/THBS3	2
BP	negative regulation of bone development	2/316	12/15514	0.0238540987081129	0.289219196335564	0.261047660087608	FBN1/RFLNA	2
BP	proximal tubule development	2/316	12/15514	0.0238540987081129	0.289219196335564	0.261047660087608	HEYL/SIM1	2
CC	microfibril	2/316	12/15514	0.0238540987081129	0.289219196335564	0.261047660087608	FBN1/FBN2	2
BP	negative regulation of calcineurin-mediated signaling	2/316	12/15514	0.0238540987081129	0.289219196335564	0.261047660087608	FHL2/RCAN1	2
BP	negative regulation of calcineurin-NFAT signaling cascade	2/316	12/15514	0.0238540987081129	0.289219196335564	0.261047660087608	FHL2/RCAN1	2
BP	peptide antigen binding	2/316	12/15514	0.0238540987081129	0.289219196335564	0.261047660087608	BOLA-DQA5/SLC7A8	2
BP	PERK-mediated unfolded protein response	2/316	12/15514	0.0238540987081129	0.289219196335564	0.261047660087608	ATF3/CCL2	2
BP	semicircular canal morphogenesis	2/316	12/15514	0.0238540987081129	0.289219196335564	0.261047660087608	FGF10/TBX1	2
BP	carboxylic acid transmembrane transport	8/316	171/15514	0.0240210250650367	0.289219196335564	0.261047660087608	SLC16A12/SLC16A13/SLC16A7/SLC16A9/SLC25A1/SLC27A6/SLC6A1/SLC7A8	8
BP	organic acid transmembrane transport	8/316	171/15514	0.0240210250650367	0.289219196335564	0.261047660087608	SLC16A12/SLC16A13/SLC16A7/SLC16A9/SLC25A1/SLC27A6/SLC6A1/SLC7A8	8
BP	lymphocyte migration	4/316	54/15514	0.0240608645965549	0.289219196335564	0.261047660087608	CCL1/CCL2/CCL21/MYO1G	4
BP	negative chemotaxis	4/316	54/15514	0.0240608645965549	0.289219196335564	0.261047660087608	OLFML2B/SEMA3A/SULF2/UNC5A	4
BP	response to monosaccharide	9/316	204/15514	0.024151569111414	0.289655643059188	0.261441594506203	AQP4/ARG2/CCL2/ELN/GPLD1/LPL/MLXIPL/NPTX1/PRKCB	9
BP	response to metal ion	17/316	493/15514	0.024571076171121	0.29225898448215	0.263791356193822	AANAT/ADCY1/ADCY7/ARG2/BDH1/C1QA/CCND1/CPNE2/ELN/GPLD1/LOXL2/MT1E/MT2A/NPTX1/NT5E/PAWR/SLC6A1	17
BP	negative regulation of protein secretion	7/316	140/15514	0.0245948665556872	0.29225898448215	0.263791356193822	ANXA1/ARG2/BANK1/CCN3/CRHR2/LGR6/RSAD2	7
BP	regulation of gonad development	3/316	31/15514	0.0246979423506042	0.29225898448215	0.263791356193822	RUNX1/SEMA3A/WNT4	3
BP	thyroid gland development	3/316	31/15514	0.0246979423506042	0.29225898448215	0.263791356193822	FGF10/HOXB3/TBX1	3
BP	lymph vessel development	3/316	31/15514	0.0246979423506042	0.29225898448215	0.263791356193822	FOXO1/PDPN/TBX1	3
BP	sensory perception of temperature stimulus	3/316	31/15514	0.0246979423506042	0.29225898448215	0.263791356193822	ANO1/CXCR4/PAWR	3
BP	granulocyte migration	5/316	81/15514	0.0247570818552157	0.29230922589584	0.263836703818217	ANXA1/CCL1/CCL2/CCL21/ITGB2	5
MF	G protein-coupled peptide receptor activity	7/316	141/15514	0.0254462168402515	0.299781205031724	0.270580871198389	ACKR4/CRHR2/CXCR4/GCGR/HCRTR1/LGR6/RXFP2	7
BP	response to copper ion	4/316	55/15514	0.0255448800043842	0.300279218594582	0.271030375508349	AANAT/ELN/LOXL2/MT1E	4
BP	regulation of immune effector process	15/316	421/15514	0.0260853727057933	0.305957289996364	0.276155371608283	ANXA1/C1QB/CCL2/CD37/CLCF1/FCER2/IFIT1/ITGB2/POMC/PTAFR/RIPK3/RSAD2/STING1/TLR9/ZNF683	15
BP	ossification	9/316	207/15514	0.0262185016312198	0.306653956935261	0.276784179365733	ASPN/CREB3L1/FHL2/GPLD1/LGR6/RASSF2/RSAD2/RUNX1/THBS3	9
MF	peptide receptor activity	7/316	142/15514	0.0263175320787632	0.306653956935261	0.276784179365733	ACKR4/CRHR2/CXCR4/GCGR/HCRTR1/LGR6/RXFP2	7
BP	positive regulation of leukocyte migration	7/316	142/15514	0.0263175320787632	0.306653956935261	0.276784179365733	CCL1/CCL2/CCL21/ITGA2B/PAWR/PTAFR/THBS4	7
BP	actin cytoskeleton	15/316	422/15514	0.026566520046843	0.308164482824397	0.278147571747209	ABLIM1/ACTC1/ARHGEF2/DPYSL3/FERMT3/GAS2L3/KIF5C/MYH1/MYH7B/MYL6B/MYO1B/MYO1G/PAWR/PDLIM4/RFLNA	15
BP	adaptation of signaling pathway	3/316	32/15514	0.0268522666723981	0.308164482824397	0.278147571747209	GRK3/PRKCB/PRKCG	3
BP	cellular response to lipoprotein particle stimulus	3/316	32/15514	0.0268522666723981	0.308164482824397	0.278147571747209	CCL2/ITGB2/LPL	3
BP	cellular response to vitamin	3/316	32/15514	0.0268522666723981	0.308164482824397	0.278147571747209	ELN/PAWR/POSTN	3
MF	lipopolysaccharide binding	3/316	32/15514	0.0268522666723981	0.308164482824397	0.278147571747209	BPI/CD6/PTAFR	3
BP	immunological synapse	3/316	32/15514	0.0268522666723981	0.308164482824397	0.278147571747209	CD37/CD3E/CD6	3
BP	lipopolysaccharide-mediated signaling pathway	3/316	32/15514	0.0268522666723981	0.308164482824397	0.278147571747209	CCL2/CD6/PTAFR	3
BP	embryonic eye morphogenesis	4/316	56/15514	0.0270828327230289	0.308813884903916	0.278733718501859	ALDH1A1/FBN1/FBN2/PITX2	4
BP	pituitary gland development	4/316	56/15514	0.0270828327230289	0.308813884903916	0.278733718501859	FGF10/PITX1/PITX2/WNT4	4
BP	regulation of collagen metabolic process	4/316	56/15514	0.0270828327230289	0.308813884903916	0.278733718501859	CCL2/CREB3L1/ITGB2/WNT4	4
BP	organic anion transport	15/316	424/15514	0.0275486176006668	0.309130844618259	0.279019804601329	ANXA1/CA4/FABP3/PLTP/SLC16A12/SLC16A13/SLC16A7/SLC16A9/SLC22A17/SLC22A18/SLC25A1/SLC27A6/SLC6A1/SLC7A8/SLCO4A1	15
BP	5-nucleotidase activity	2/316	13/15514	0.02781717615256	0.309130844618259	0.279019804601329	NT5C2/NT5E	2
BP	adenosine metabolic process	2/316	13/15514	0.02781717615256	0.309130844618259	0.279019804601329	NT5C2/NT5E	2
BP	facial nerve development	2/316	13/15514	0.02781717615256	0.309130844618259	0.279019804601329	HOXB2/SEMA3A	2
BP	cAMP biosynthetic process	2/316	13/15514	0.02781717615256	0.309130844618259	0.279019804601329	ADCY1/ADCY7	2
BP	vulval cell fate specification	2/316	13/15514	0.02781717615256	0.309130844618259	0.279019804601329	ITGA8/ITGB2	2
BP	myoblast migration	2/316	13/15514	0.02781717615256	0.309130844618259	0.279019804601329	ANXA1/THBS4	2
BP	opsonin binding	2/316	13/15514	0.02781717615256	0.309130844618259	0.279019804601329	ITGB2/PTX3	2
BP	pronephric nephron development	2/316	13/15514	0.02781717615256	0.309130844618259	0.279019804601329	IRX1/SIM1	2
BP	regulation of glial cell apoptotic process	2/316	13/15514	0.02781717615256	0.309130844618259	0.279019804601329	CCL2/PRKCB	2
BP	angiogenesis	11/316	279/15514	0.0281719991202501	0.309130844618259	0.279019804601329	CCL2/CCN3/CXCR4/FGF10/GPLD1/GPR4/HOXB3/LOXL2/PITX2/SEMA3A/TBX1	11
BP	regulation of myeloid cell differentiation	10/316	244/15514	0.0282046636534109	0.309130844618259	0.279019804601329	C1QA/CCL21/FBN1/INHA/ISG15/ITGA2B/PRKCB/RAB7B/RASSF2/RUNX1	10
BP	endocrine system development	8/316	177/15514	0.0287281351111756	0.309130844618259	0.279019804601329	ANXA1/FGF10/FOXO1/HOXB3/PITX1/PITX2/TBX1/WNT4	8
BP	embryonic viscerocranium morphogenesis	3/316	33/15514	0.0291037549822491	0.309130844618259	0.279019804601329	PITX2/TBX1/WNT4	3
BP	negative regulation of myeloid cell differentiation	5/316	85/15514	0.0297073869087007	0.309130844618259	0.279019804601329	C1QA/CCL21/FBN1/INHA/RUNX1	5
BP	cellular response to carbohydrate stimulus	6/316	115/15514	0.0302346408750194	0.309130844618259	0.279019804601329	AQP4/CCL2/ELN/MLXIPL/NPTX1/PRKCB	6
BP	protein activation cascade	4/316	58/15514	0.0303217803915016	0.309130844618259	0.279019804601329	C1QA/C1QB/GP5/TFPI	4
BP	response to interleukin-1	8/316	179/15514	0.0304294695643357	0.309130844618259	0.279019804601329	ANXA1/CCL1/CCL2/CCL21/CHI3L1/MT2A/PAWR/TFPI	8
BP	regulation of vasculature development	13/316	355/15514	0.0304532100731531	0.309130844618259	0.279019804601329	ANXA1/CCL2/CEMIP2/CHI3L1/CREB3L1/CRHR2/CXCR4/GPR4/ITGB2/PRKCB/RUNX1/THBS4/WNT4	13
BP	regulation of coagulation	5/316	86/15514	0.0310354454484277	0.309130844618259	0.279019804601329	GP5/HS3ST5/PDPN/PRKCB/TFPI	5
BP	epithelial cell proliferation	6/316	116/15514	0.0313603732392432	0.309130844618259	0.279019804601329	CCN3/CCND1/COL8A1/FGF10/LOXL2/MKI67	6
BP	detection of light stimulus involved in sensory perception	3/316	34/15514	0.0314520424033876	0.309130844618259	0.279019804601329	PRKCB/PRKCG/REEP6	3
BP	detection of temperature stimulus	3/316	34/15514	0.0314520424033876	0.309130844618259	0.279019804601329	ANO1/CXCR4/PAWR	3
BP	metanephric nephron development	3/316	34/15514	0.0314520424033876	0.309130844618259	0.279019804601329	IRX1/IRX2/WNT4	3
BP	positive regulation of collagen biosynthetic process	3/316	34/15514	0.0314520424033876	0.309130844618259	0.279019804601329	CCL2/CREB3L1/WNT4	3
BP	negative regulation of B cell activation	3/316	34/15514	0.0314520424033876	0.309130844618259	0.279019804601329	BANK1/INHA/PAWR	3
BP	positive regulation of phosphatase activity	3/316	34/15514	0.0314520424033876	0.309130844618259	0.279019804601329	GPLD1/PAWR/RIPK3	3
BP	response to retinoic acid	7/316	148/15514	0.0319749030153167	0.309130844618259	0.279019804601329	ALDH1A1/CCL2/ELN/MEST/PITX2/RUNX1/TBX1	7
BP	epithelial structure maintenance	4/316	59/15514	0.0320232874443504	0.309130844618259	0.279019804601329	ITGA8/ITGB2/TLR9/UHRF1	4
BP	anion homeostasis	4/316	59/15514	0.0320232874443504	0.309130844618259	0.279019804601329	FABP3/MLXIPL/SFRP4/WNK4	4
CC	specific granule lumen	4/316	59/15514	0.0320232874443504	0.309130844618259	0.279019804601329	BPI/CHI3L1/PTX3/QPCT	4
BP	peptide hormone binding	4/316	59/15514	0.0320232874443504	0.309130844618259	0.279019804601329	CRHR2/GCGR/HCRTR1/RXFP2	4
BP	central nervous system morphogenesis	2/316	14/15514	0.0320235410265178	0.309130844618259	0.279019804601329	ITGA8/ITGB2	2
BP	negative regulation of glycoprotein metabolic process	2/316	14/15514	0.0320235410265178	0.309130844618259	0.279019804601329	ITM2C/PTX3	2
BP	tooth mineralization	2/316	14/15514	0.0320235410265178	0.309130844618259	0.279019804601329	FOXO1/TBX1	2
BP	vulval cell fate commitment	2/316	14/15514	0.0320235410265178	0.309130844618259	0.279019804601329	ITGA8/ITGB2	2
CC	interstitial matrix	2/316	14/15514	0.0320235410265178	0.309130844618259	0.279019804601329	ECM2/NEPN	2
BP	inaD signaling complex	2/316	14/15514	0.0320235410265178	0.309130844618259	0.279019804601329	PRKCB/PRKCG	2
BP	iron coordination entity transport	2/316	14/15514	0.0320235410265178	0.309130844618259	0.279019804601329	FLVCR2/SLC22A17	2
BP	negative regulation of type 2 immune response	2/316	14/15514	0.0320235410265178	0.309130844618259	0.279019804601329	ANXA1/ARG2	2
BP	polysaccharide binding	2/316	14/15514	0.0320235410265178	0.309130844618259	0.279019804601329	PTX3/STBD1	2
BP	secondary active monocarboxylate transmembrane transporter activity	2/316	14/15514	0.0320235410265178	0.309130844618259	0.279019804601329	SLC16A7/SLC6A1	2
BP	ventricular cardiac muscle cell development	2/316	14/15514	0.0320235410265178	0.309130844618259	0.279019804601329	FHL2/PITX2	2
BP	regulation of angiogenesis	12/316	321/15514	0.0320925627405151	0.309130844618259	0.279019804601329	ANXA1/CCL2/CEMIP2/CHI3L1/CREB3L1/CRHR2/CXCR4/GPR4/ITGB2/PRKCB/RUNX1/THBS4	12
BP	positive regulation of small molecule metabolic process	8/316	181/15514	0.0321988265558179	0.309130844618259	0.279019804601329	ANXA1/ESRRB/FOXO1/GPLD1/MLXIPL/PFKFB3/PTAFR/WNT4	8
BP	activation of immune response	13/316	358/15514	0.0322737779785606	0.309130844618259	0.279019804601329	BOLA-DQA5/C1QA/C1QB/CD3E/GPLD1/IFIH1/ITGB2/MYO1G/PRKCB/PTAFR/STING1/TLR9/ZNF683	13
CC	actin filament	5/316	87/15514	0.0324002102103704	0.309130844618259	0.279019804601329	ACTC1/DPYSL3/MYO1B/PAWR/PDLIM4	5
BP	basal part of cell	6/316	117/15514	0.0325131295874546	0.309130844618259	0.279019804601329	ABLIM1/AQP4/ITGA8/ITGB2/MYRF/NID1	6
BP	regulation of leukocyte chemotaxis	6/316	117/15514	0.0325131295874546	0.309130844618259	0.279019804601329	CCL1/CCL2/CCL21/CCN3/PADI2/THBS4	6
BP	negative regulation of cell migration	11/316	286/15514	0.0328860243269685	0.309130844618259	0.279019804601329	CCL2/CCL21/CCN3/DPYSL3/ITGB2/KIF26A/PADI2/SEMA3A/SRGAP1/STK26/WNT4	11
BP	response to glucose	8/316	182/15514	0.0331093453789086	0.309130844618259	0.279019804601329	AQP4/ARG2/CCL2/GPLD1/LPL/MLXIPL/NPTX1/PRKCB	8
BP	G protein-coupled receptor signaling pathway, coupled to cyclic nucleotide second messenger	9/316	216/15514	0.0331654464307427	0.309130844618259	0.279019804601329	ADCY1/ADCY7/ANXA1/CCL2/CRHR2/GCGR/HRH2/RGS1/RXFP2	9
BP	positive regulation of leukocyte cell-cell adhesion	9/316	216/15514	0.0331654464307427	0.309130844618259	0.279019804601329	ANXA1/BOLA-DQA5/CCL2/CCL21/CD3E/CD6/PAWR/PTAFR/RUNX1	9
BP	platelet activation	6/316	118/15514	0.0336931027837518	0.309130844618259	0.279019804601329	FERMT3/GP5/ITGA2B/PDPN/PRKCB/PRKCG	6
BP	regulation of biomineral tissue development	5/316	88/15514	0.0338019079225748	0.309130844618259	0.279019804601329	ASPN/FBN2/ISG15/RFLNA/WNT4	5
BP	positive regulation of Ras protein signal transduction	5/316	88/15514	0.0338019079225748	0.309130844618259	0.279019804601329	ARHGEF2/FGF10/GPR4/PLEKHG5/RASGRP3	5
BP	positive regulation of collagen metabolic process	3/316	35/15514	0.0338966486710675	0.309130844618259	0.279019804601329	CCL2/CREB3L1/WNT4	3
BP	positive regulation of myeloid leukocyte mediated immunity	3/316	35/15514	0.0338966486710675	0.309130844618259	0.279019804601329	ITGB2/POMC/PTAFR	3
BP	negative regulation of lymphocyte activation	7/316	150/15514	0.0340284084245184	0.309130844618259	0.279019804601329	ANXA1/ARG2/BANK1/BOLA-DQA5/INHA/PAWR/RUNX1	7
BP	myofibril	11/316	288/15514	0.0343299936642962	0.309130844618259	0.279019804601329	ACTC1/FHL2/GRK3/ITGA8/ITGB2/KRT8/MYH1/MYH15/MYH7B/MYL4/SCN3B	11
BP	positive regulation of leukocyte activation	12/316	325/15514	0.0347883154525927	0.309130844618259	0.279019804601329	ANXA1/BOLA-DQA5/CCL2/CCL21/CD3E/CD6/CLCF1/FGF10/ITGB2/PTAFR/RUNX1/TLR9	12
BP	cellular response to xenobiotic stimulus	8/316	184/15514	0.0349827014371447	0.309130844618259	0.279019804601329	ARG2/CACNA1G/CCL2/ELN/EPHX2/FOXO1/PON3/PRKCB	8
BP	antimicrobial humoral immune response mediated by antimicrobial peptide	5/316	89/15514	0.0352407481621187	0.309130844618259	0.279019804601329	BPI/CCL1/CCL2/CCL21/POMC	5
BP	positive regulation of lipid biosynthetic process	6/316	120/15514	0.0361354277775217	0.309130844618259	0.279019804601329	ANXA1/FABP3/GPLD1/MLXIPL/NT5E/WNT4	6
BP	fatty acid derivative metabolic process	7/316	152/15514	0.0361678768716863	0.309130844618259	0.279019804601329	BDH1/EPHX2/PDPN/PON3/PTGDS/SCD5/SLC25A1	7
BP	chemokine activity	3/316	36/15514	0.0364369847528893	0.309130844618259	0.279019804601329	CCL1/CCL2/CCL21	3
BP	definitive hemopoiesis	3/316	36/15514	0.0364369847528893	0.309130844618259	0.279019804601329	CXCR4/HOXB3/RUNX1	3
BP	regulation of platelet activation	3/316	36/15514	0.0364369847528893	0.309130844618259	0.279019804601329	GP5/PDPN/PRKCB	3
BP	renal water homeostasis	3/316	36/15514	0.0364369847528893	0.309130844618259	0.279019804601329	ADCY1/ADCY7/AQP4	3
BP	calcium-dependent protein serine/threonine kinase activity	2/316	15/15514	0.0364617047866315	0.309130844618259	0.279019804601329	PRKCB/PRKCG	2
BP	activation of cysteine-type endopeptidase activity	2/316	15/15514	0.0364617047866315	0.309130844618259	0.279019804601329	CIDEB/PAWR	2
BP	ethanol metabolic process	2/316	15/15514	0.0364617047866315	0.309130844618259	0.279019804601329	ACSS1/ALDH1A1	2
BP	nucleotidase activity	2/316	15/15514	0.0364617047866315	0.309130844618259	0.279019804601329	NT5C2/NT5E	2
BP	one-carbon compound transport	2/316	15/15514	0.0364617047866315	0.309130844618259	0.279019804601329	AQP4/CA4	2
BP	positive regulation of cholesterol efflux	2/316	15/15514	0.0364617047866315	0.309130844618259	0.279019804601329	PLTP/PON1	2
BP	response to stimulus involved in regulation of muscle adaptation	2/316	15/15514	0.0364617047866315	0.309130844618259	0.279019804601329	PRKAG3/RUNX1	2
BP	synaptic target inhibition	2/316	15/15514	0.0364617047866315	0.309130844618259	0.279019804601329	OLFML2B/SULF2	2
BP	positive regulation of stress-activated MAPK cascade	8/316	186/15514	0.0369266299814389	0.309130844618259	0.279019804601329	ARHGEF2/CCL21/CRHR2/NRK/RASSF2/SEMA3A/TLR9/TPD52L1	8
BP	carbohydrate metabolic process	14/316	403/15514	0.0370706741167076	0.309130844618259	0.279019804601329	ALDH1A1/ATF3/DCXR/ESRRB/FBN1/GK5/OAS1X/OAS1Y/OAS1Z/PCDH12/PFKFB3/PRKAG3/SLC25A1/STBD1	14
BP	positive regulation of NF-kappaB transcription factor activity	7/316	153/15514	0.0372702081346402	0.309130844618259	0.279019804601329	ARHGEF2/CRHR2/ITGB2/PRKCB/RAB7B/RIPK3/TLR9	7
BP	negative regulation of cytokine secretion	4/316	62/15514	0.0374581671511112	0.309130844618259	0.279019804601329	ANXA1/ARG2/BANK1/LGR6	4
BP	regulation of cell-cell adhesion	15/316	442/15514	0.0376362445959965	0.309130844618259	0.279019804601329	ANXA1/ARG2/BOLA-DQA5/CCL2/CCL21/CD3E/CD6/FERMT3/LGR6/PAWR/PDPN/PRKCB/PTAFR/RUNX1/WNT4	15
BP	cell chemotaxis	8/316	187/15514	0.0379253526309439	0.309130844618259	0.279019804601329	ANXA1/CCL1/CCL2/CCL21/CCN3/CXCR4/ITGB2/PLEKHG5	8
BP	positive regulation of chemotaxis	8/316	187/15514	0.0379253526309439	0.309130844618259	0.279019804601329	CCL1/CCL2/CCL21/FGF10/GRK3/NAV2/THBS4/WNT4	8
BP	positive regulation of stress-activated protein kinase signaling cascade	8/316	187/15514	0.0379253526309439	0.309130844618259	0.279019804601329	ARHGEF2/CCL21/CRHR2/NRK/RASSF2/SEMA3A/TLR9/TPD52L1	8
BP	response to xenobiotic stimulus	13/316	367/15514	0.0382068061037538	0.309130844618259	0.279019804601329	ARG2/CACNA1G/CCL2/CXCR4/ELN/EPHX2/FOXO1/PON3/PRKCB/PRKCG/PRSS2/PTAFR/SLC6A1	13
BP	regulation of GTPase activity	15/316	444/15514	0.0389026376568708	0.309130844618259	0.279019804601329	ALDH1A1/ARHGAP15/ARHGAP30/CCL1/CCL2/CCL21/PLEKHG5/RASGRP3/RGS1/RGS14/RGSL1/SRGAP1/STK26/TBC1D1/WNT4	15
BP	regeneration	10/316	258/15514	0.0390197817972235	0.309130844618259	0.279019804601329	ANXA1/CCL2/CCN3/CCND1/FGF10/LGR6/MYMK/SULF2/UHRF1/WNT4	10
BP	positive regulation of interleukin-2 production	3/316	37/15514	0.0390723592132425	0.309130844618259	0.279019804601329	ANXA1/CD3E/RUNX1	3
BP	regulation of rhodopsin mediated signaling pathway	3/316	37/15514	0.0390723592132425	0.309130844618259	0.279019804601329	GRK3/PRKCB/PRKCG	3
BP	glomerulus development	4/316	63/15514	0.0393803018983052	0.309130844618259	0.279019804601329	GPR4/HEYL/NID1/SULF2	4
BP	epithelial cell migration	11/316	295/15514	0.0397364606394672	0.309130844618259	0.279019804601329	CCN3/FGF10/GMFG/GPLD1/ITGA8/ITGB2/LGR6/LOXL2/MYH7B/PLEKHG5/PRSS2	11
BP	sarcomere	10/316	259/15514	0.0398881015479221	0.309130844618259	0.279019804601329	ACTC1/FHL2/GRK3/ITGA8/ITGB2/KRT8/MYH1/MYH7B/MYL4/SCN3B	10
BP	3-hydroxybutyrate dehydrogenase activity	1/316	2/15514	0.0403238008342111	0.309130844618259	0.279019804601329	BDH1	1
BP	acetate biosynthetic process	1/316	2/15514	0.0403238008342111	0.309130844618259	0.279019804601329	ACSS1	1
BP	adenosine biosynthetic process	1/316	2/15514	0.0403238008342111	0.309130844618259	0.279019804601329	NT5E	1
BP	anterograde dendritic transport of messenger ribonucleoprotein complex	1/316	2/15514	0.0403238008342111	0.309130844618259	0.279019804601329	KIF5C	1
BP	arginine catabolic process to ornithine	1/316	2/15514	0.0403238008342111	0.309130844618259	0.279019804601329	ARG2	1
BP	CCR7 chemokine receptor binding	1/316	2/15514	0.0403238008342111	0.309130844618259	0.279019804601329	CCL21	1
BP	chemokinesis	1/316	2/15514	0.0403238008342111	0.309130844618259	0.279019804601329	CCL2	1
BP	coumarin catabolic process	1/316	2/15514	0.0403238008342111	0.309130844618259	0.279019804601329	PON3	1
BP	creatine transmembrane transport	1/316	2/15514	0.0403238008342111	0.309130844618259	0.279019804601329	SLC16A12	1
BP	defense response to tumor cell	1/316	2/15514	0.0403238008342111	0.309130844618259	0.279019804601329	PRF1	1
BP	dendritic transport of messenger ribonucleoprotein complex	1/316	2/15514	0.0403238008342111	0.309130844618259	0.279019804601329	KIF5C	1
BP	dendritic transport of ribonucleoprotein complex	1/316	2/15514	0.0403238008342111	0.309130844618259	0.279019804601329	KIF5C	1
BP	esophagus smooth muscle contraction	1/316	2/15514	0.0403238008342111	0.309130844618259	0.279019804601329	SULF2	1
BP	glucose mediated signaling pathway	1/316	2/15514	0.0403238008342111	0.309130844618259	0.279019804601329	MLXIPL	1
BP	actin filament debranching	1/316	2/15514	0.0403238008342111	0.309130844618259	0.279019804601329	GMFG	1
BP	AMP catabolic process	1/316	2/15514	0.0403238008342111	0.309130844618259	0.279019804601329	NT5E	1
BP	branch elongation involved in salivary gland morphogenesis	1/316	2/15514	0.0403238008342111	0.309130844618259	0.279019804601329	FGF10	1
BP	cell proliferation involved in heart morphogenesis	1/316	2/15514	0.0403238008342111	0.309130844618259	0.279019804601329	PITX2	1
BP	cell proliferation involved in outflow tract morphogenesis	1/316	2/15514	0.0403238008342111	0.309130844618259	0.279019804601329	PITX2	1
BP	cellular response to gravity	1/316	2/15514	0.0403238008342111	0.309130844618259	0.279019804601329	PTAFR	1
BP	cellular response to iron(II) ion	1/316	2/15514	0.0403238008342111	0.309130844618259	0.279019804601329	GPLD1	1
BP	cellular response to L-ascorbic acid	1/316	2/15514	0.0403238008342111	0.309130844618259	0.279019804601329	ELN	1
BP	cortisol secretion	1/316	2/15514	0.0403238008342111	0.309130844618259	0.279019804601329	POMC	1
BP	dendritic cell dendrite assembly	1/316	2/15514	0.0403238008342111	0.309130844618259	0.279019804601329	CCL21	1
BP	distal tubule morphogenesis	1/316	2/15514	0.0403238008342111	0.309130844618259	0.279019804601329	WNK4	1
BP	fibroblast growth factor receptor signaling pathway involved in mammary gland specification	1/316	2/15514	0.0403238008342111	0.309130844618259	0.279019804601329	FGF10	1
BP	helper T cell extravasation	1/316	2/15514	0.0403238008342111	0.309130844618259	0.279019804601329	CCL2	1
BP	hematopoietic stem cell migration to bone marrow	1/316	2/15514	0.0403238008342111	0.309130844618259	0.279019804601329	GPLD1	1
BP	histone H3-T6 phosphorylation	1/316	2/15514	0.0403238008342111	0.309130844618259	0.279019804601329	PRKCB	1
BP	interferon-beta production	1/316	2/15514	0.0403238008342111	0.309130844618259	0.279019804601329	STING1	1
BP	left lung morphogenesis	1/316	2/15514	0.0403238008342111	0.309130844618259	0.279019804601329	PITX2	1
BP	mammary gland bud formation	1/316	2/15514	0.0403238008342111	0.309130844618259	0.279019804601329	FGF10	1
BP	mesangial cell-matrix adhesion	1/316	2/15514	0.0403238008342111	0.309130844618259	0.279019804601329	CCL21	1
BP	mesenchymal cell apoptotic process	1/316	2/15514	0.0403238008342111	0.309130844618259	0.279019804601329	TBX1	1
BP	mesenchymal cell differentiation involved in lung development	1/316	2/15514	0.0403238008342111	0.309130844618259	0.279019804601329	FGF10	1
BP	monocyte homeostasis	1/316	2/15514	0.0403238008342111	0.309130844618259	0.279019804601329	CCL2	1
BP	monounsaturated fatty acid biosynthetic process	1/316	2/15514	0.0403238008342111	0.309130844618259	0.279019804601329	SCD5	1
BP	multi-organism cellular localization	1/316	2/15514	0.0403238008342111	0.309130844618259	0.279019804601329	IFIT1	1
BP	negative regulation by host of symbiont catalytic activity	1/316	2/15514	0.0403238008342111	0.309130844618259	0.279019804601329	PTX3	1
BP	negative regulation of cell adhesion molecule production	1/316	2/15514	0.0403238008342111	0.309130844618259	0.279019804601329	AQP4	1
BP	negative regulation of exo-alpha-sialidase activity	1/316	2/15514	0.0403238008342111	0.309130844618259	0.279019804601329	PTX3	1
BP	negative regulation of macrophage inflammatory protein 1 alpha production	1/316	2/15514	0.0403238008342111	0.309130844618259	0.279019804601329	ARG2	1
BP	negative regulation of tooth mineralization	1/316	2/15514	0.0403238008342111	0.309130844618259	0.279019804601329	ASPN	1
BP	peptidyl-lysine oxidation	1/316	2/15514	0.0403238008342111	0.309130844618259	0.279019804601329	LOXL2	1
BP	peptidyl-pyroglutamic acid biosynthetic process, using glutaminyl-peptide cyclotransferase	1/316	2/15514	0.0403238008342111	0.309130844618259	0.279019804601329	QPCT	1
BP	positive regulation of amyloid precursor protein biosynthetic process	1/316	2/15514	0.0403238008342111	0.309130844618259	0.279019804601329	PAWR	1
BP	positive regulation of hair follicle cell proliferation	1/316	2/15514	0.0403238008342111	0.309130844618259	0.279019804601329	FGF10	1
BP	positive regulation of hindgut contraction	1/316	2/15514	0.0403238008342111	0.309130844618259	0.279019804601329	PAWR	1
BP	positive regulation of mesenchymal stem cell migration	1/316	2/15514	0.0403238008342111	0.309130844618259	0.279019804601329	CXCR4	1
BP	positive regulation of mismatch repair	1/316	2/15514	0.0403238008342111	0.309130844618259	0.279019804601329	PRKCG	1
BP	positive regulation of voltage-gated chloride channel activity	1/316	2/15514	0.0403238008342111	0.309130844618259	0.279019804601329	PTAFR	1
BP	positive regulation of white fat cell proliferation	1/316	2/15514	0.0403238008342111	0.309130844618259	0.279019804601329	FGF10	1
BP	pronephric proximal tubule development	1/316	2/15514	0.0403238008342111	0.309130844618259	0.279019804601329	SIM1	1
BP	pulmonary vein morphogenesis	1/316	2/15514	0.0403238008342111	0.309130844618259	0.279019804601329	PITX2	1
BP	regulation of activated CD8-positive, alpha-beta T cell apoptotic process	1/316	2/15514	0.0403238008342111	0.309130844618259	0.279019804601329	ARG2	1
BP	regulation of cell proliferation involved in embryonic placenta development	1/316	2/15514	0.0403238008342111	0.309130844618259	0.279019804601329	NRK	1
BP	regulation of exo-alpha-sialidase activity	1/316	2/15514	0.0403238008342111	0.309130844618259	0.279019804601329	PTX3	1
BP	regulation of extrathymic T cell differentiation	1/316	2/15514	0.0403238008342111	0.309130844618259	0.279019804601329	ZNF683	1
BP	regulation of mesenchymal stem cell migration	1/316	2/15514	0.0403238008342111	0.309130844618259	0.279019804601329	CXCR4	1
BP	regulation of myofibroblast contraction	1/316	2/15514	0.0403238008342111	0.309130844618259	0.279019804601329	PDPN	1
BP	regulation of spongiotrophoblast cell proliferation	1/316	2/15514	0.0403238008342111	0.309130844618259	0.279019804601329	NRK	1
BP	regulation of transcription from RNA polymerase II promoter in response to arsenic-containing substance	1/316	2/15514	0.0403238008342111	0.309130844618259	0.279019804601329	ATF3	1
BP	regulation of voltage-gated chloride channel activity	1/316	2/15514	0.0403238008342111	0.309130844618259	0.279019804601329	PTAFR	1
BP	secretion by lung epithelial cell involved in lung growth	1/316	2/15514	0.0403238008342111	0.309130844618259	0.279019804601329	FGF10	1
BP	semicircular canal fusion	1/316	2/15514	0.0403238008342111	0.309130844618259	0.279019804601329	FGF10	1
BP	Spemann organizer formation at the dorsal lip of the blastopore	1/316	2/15514	0.0403238008342111	0.309130844618259	0.279019804601329	IRX1	1
BP	submandibular salivary gland formation	1/316	2/15514	0.0403238008342111	0.309130844618259	0.279019804601329	FGF10	1
BP	xylulose catabolic process	1/316	2/15514	0.0403238008342111	0.309130844618259	0.279019804601329	DCXR	1
CC	CNTFR-CLCF1 complex	1/316	2/15514	0.0403238008342111	0.309130844618259	0.279019804601329	CLCF1	1
CC	complement component C1 complex	1/316	2/15514	0.0403238008342111	0.309130844618259	0.279019804601329	C1QB	1
CC	CRLF-CLCF1 complex	1/316	2/15514	0.0403238008342111	0.309130844618259	0.279019804601329	CLCF1	1
CC	inhibin A complex	1/316	2/15514	0.0403238008342111	0.309130844618259	0.279019804601329	INHA	1
CC	inhibin B complex	1/316	2/15514	0.0403238008342111	0.309130844618259	0.279019804601329	INHA	1
CC	integrin alpha8-beta1 complex	1/316	2/15514	0.0403238008342111	0.309130844618259	0.279019804601329	ITGA8	1
CC	integrin alphaL-beta2 complex	1/316	2/15514	0.0403238008342111	0.309130844618259	0.279019804601329	ITGB2	1
CC	integrin alphaM-beta2 complex	1/316	2/15514	0.0403238008342111	0.309130844618259	0.279019804601329	ITGB2	1
CC	leading edge of lamellipodium	1/316	2/15514	0.0403238008342111	0.309130844618259	0.279019804601329	PDPN	1
MF	acyl-L-homoserine-lactone lactonohydrolase activity	1/316	2/15514	0.0403238008342111	0.309130844618259	0.279019804601329	PON3	1
MF	arginase activity	1/316	2/15514	0.0403238008342111	0.309130844618259	0.279019804601329	ARG2	1
MF	arylamine N-acetyltransferase activity	1/316	2/15514	0.0403238008342111	0.309130844618259	0.279019804601329	AANAT	1
MF	creatine transmembrane transporter activity	1/316	2/15514	0.0403238008342111	0.309130844618259	0.279019804601329	SLC16A12	1
MF	glucagon receptor activity	1/316	2/15514	0.0403238008342111	0.309130844618259	0.279019804601329	GCGR	1
MF	glutaminyl-peptide cyclotransferase activity	1/316	2/15514	0.0403238008342111	0.309130844618259	0.279019804601329	QPCT	1
MF	histone kinase activity (H3-T6 specific)	1/316	2/15514	0.0403238008342111	0.309130844618259	0.279019804601329	PRKCB	1
MF	interleukin-2 receptor activity	1/316	2/15514	0.0403238008342111	0.309130844618259	0.279019804601329	IL2RB	1
BP	hexose mediated signaling	1/316	2/15514	0.0403238008342111	0.309130844618259	0.279019804601329	MLXIPL	1
BP	histone H3-R26 citrullination	1/316	2/15514	0.0403238008342111	0.309130844618259	0.279019804601329	PADI2	1
BP	ICAM-3 receptor activity	1/316	2/15514	0.0403238008342111	0.309130844618259	0.279019804601329	ITGB2	1
BP	kinesis	1/316	2/15514	0.0403238008342111	0.309130844618259	0.279019804601329	CCL2	1
BP	lactonohydrolase activity	1/316	2/15514	0.0403238008342111	0.309130844618259	0.279019804601329	PON3	1
BP	left-handed Z-DNA binding	1/316	2/15514	0.0403238008342111	0.309130844618259	0.279019804601329	ZBP1	1
BP	MDA-5 signaling pathway	1/316	2/15514	0.0403238008342111	0.309130844618259	0.279019804601329	IFIH1	1
BP	melatonin biosynthetic process	1/316	2/15514	0.0403238008342111	0.309130844618259	0.279019804601329	AANAT	1
BP	modulation by host of viral catalytic activity	1/316	2/15514	0.0403238008342111	0.309130844618259	0.279019804601329	PTX3	1
BP	modulation by host of viral exo-alpha-sialidase activity	1/316	2/15514	0.0403238008342111	0.309130844618259	0.279019804601329	PTX3	1
BP	modulation by host of viral glycoprotein metabolic process	1/316	2/15514	0.0403238008342111	0.309130844618259	0.279019804601329	PTX3	1
BP	myoblast migration involved in skeletal muscle regeneration	1/316	2/15514	0.0403238008342111	0.309130844618259	0.279019804601329	ANXA1	1
BP	negative regulation by host of viral exo-alpha-sialidase activity	1/316	2/15514	0.0403238008342111	0.309130844618259	0.279019804601329	PTX3	1
BP	negative regulation by host of viral glycoprotein metabolic process	1/316	2/15514	0.0403238008342111	0.309130844618259	0.279019804601329	PTX3	1
BP	negative regulation of antigen processing and presentation of peptide antigen via MHC class II	1/316	2/15514	0.0403238008342111	0.309130844618259	0.279019804601329	BOLA-DOB	1
BP	negative regulation of arachidonic acid secretion	1/316	2/15514	0.0403238008342111	0.309130844618259	0.279019804601329	HRH2	1
BP	negative regulation of intracellular transport of viral material	1/316	2/15514	0.0403238008342111	0.309130844618259	0.279019804601329	MX1	1
BP	negative regulation of pupariation	1/316	2/15514	0.0403238008342111	0.309130844618259	0.279019804601329	RXFP2	1
BP	negative regulation of toll-like receptor 9 signaling pathway	1/316	2/15514	0.0403238008342111	0.309130844618259	0.279019804601329	RAB7B	1
BP	oxidoreductase activity, acting on the CH-NH group of donors, flavin as acceptor	1/316	2/15514	0.0403238008342111	0.309130844618259	0.279019804601329	SARDH	1
BP	phenylpropanoid catabolic process	1/316	2/15514	0.0403238008342111	0.309130844618259	0.279019804601329	PON3	1
BP	platelet alpha granule organization	1/316	2/15514	0.0403238008342111	0.309130844618259	0.279019804601329	ZNF385A	1
BP	porin activity	1/316	2/15514	0.0403238008342111	0.309130844618259	0.279019804601329	AQP4	1
BP	positive regulation of DNA damage response, signal transduction by p53 class mediator resulting in transcription of p21 class mediator	1/316	2/15514	0.0403238008342111	0.309130844618259	0.279019804601329	ZNF385A	1
BP	positive regulation of high-density lipoprotein particle clearance	1/316	2/15514	0.0403238008342111	0.309130844618259	0.279019804601329	GPLD1	1
BP	positive regulation of immune complex clearance by monocytes and macrophages	1/316	2/15514	0.0403238008342111	0.309130844618259	0.279019804601329	CCL2	1
BP	positive regulation of platelet aggregation	1/316	2/15514	0.0403238008342111	0.309130844618259	0.279019804601329	PDPN	1
BP	positive regulation of serotonin secretion	1/316	2/15514	0.0403238008342111	0.309130844618259	0.279019804601329	CRHR2	1
BP	positive regulation of toll-like receptor 7 signaling pathway	1/316	2/15514	0.0403238008342111	0.309130844618259	0.279019804601329	RSAD2	1
BP	primary amino compound catabolic process	1/316	2/15514	0.0403238008342111	0.309130844618259	0.279019804601329	GRK3	1
BP	pronephric nephron morphogenesis	1/316	2/15514	0.0403238008342111	0.309130844618259	0.279019804601329	IRX1	1
BP	pronephric nephron tubule morphogenesis	1/316	2/15514	0.0403238008342111	0.309130844618259	0.279019804601329	IRX1	1
BP	propionate biosynthetic process	1/316	2/15514	0.0403238008342111	0.309130844618259	0.279019804601329	ACSS1	1
BP	pulmonary myocardium development	1/316	2/15514	0.0403238008342111	0.309130844618259	0.279019804601329	PITX2	1
BP	regulation of chromatin disassembly	1/316	2/15514	0.0403238008342111	0.309130844618259	0.279019804601329	PADI2	1
BP	regulation of L-arginine import	1/316	2/15514	0.0403238008342111	0.309130844618259	0.279019804601329	ARG2	1
BP	regulation of pupariation	1/316	2/15514	0.0403238008342111	0.309130844618259	0.279019804601329	RXFP2	1
BP	regulation of toll-like receptor 7 signaling pathway	1/316	2/15514	0.0403238008342111	0.309130844618259	0.279019804601329	RSAD2	1
BP	response to symbiotic bacterium	1/316	2/15514	0.0403238008342111	0.309130844618259	0.279019804601329	PTAFR	1
BP	sarcosine metabolic process	1/316	2/15514	0.0403238008342111	0.309130844618259	0.279019804601329	SARDH	1
BP	serotonin catabolic process	1/316	2/15514	0.0403238008342111	0.309130844618259	0.279019804601329	GRK3	1
BP	specification of segmental identity, labial segment	1/316	2/15514	0.0403238008342111	0.309130844618259	0.279019804601329	HOXB2	1
BP	sugar mediated signaling pathway	1/316	2/15514	0.0403238008342111	0.309130844618259	0.279019804601329	MLXIPL	1
BP	vagus nerve development	1/316	2/15514	0.0403238008342111	0.309130844618259	0.279019804601329	TBX1	1
BP	vagus nerve morphogenesis	1/316	2/15514	0.0403238008342111	0.309130844618259	0.279019804601329	TBX1	1
BP	voltage-gated calcium channel activity involved in AV node cell action potential	1/316	2/15514	0.0403238008342111	0.309130844618259	0.279019804601329	CACNA1G	1
BP	voltage-gated calcium channel activity involved SA node cell action potential	1/316	2/15514	0.0403238008342111	0.309130844618259	0.279019804601329	CACNA1G	1
BP	Wnt receptor catabolic process	1/316	2/15514	0.0403238008342111	0.309130844618259	0.279019804601329	RNF43	1
BP	zygote asymmetric cell division	1/316	2/15514	0.0403238008342111	0.309130844618259	0.279019804601329	RGS14	1
BP	receptor regulator activity	13/316	370/15514	0.0403466548375005	0.309130844618259	0.279019804601329	CCL1/CCL2/CCL21/CCN3/CLCF1/CRHR2/FBN1/FGF10/IGSF1/INHA/POMC/SEMA3A/WNT4	13
BP	response to hexose	8/316	190/15514	0.0410298864400361	0.311474955170325	0.2811355859269	AQP4/ARG2/CCL2/GPLD1/LPL/MLXIPL/NPTX1/PRKCB	8
BP	calcium-dependent protein kinase activity	2/316	16/15514	0.0411205433774157	0.311474955170325	0.2811355859269	PRKCB/PRKCG	2
BP	regulation of necroptotic process	2/316	16/15514	0.0411205433774157	0.311474955170325	0.2811355859269	ARHGEF2/RIPK3	2
MF	heparan sulfate sulfotransferase activity	2/316	16/15514	0.0411205433774157	0.311474955170325	0.2811355859269	HS3ST5/SULF2	2
BP	humoral immune response mediated by circulating immunoglobulin	2/316	16/15514	0.0411205433774157	0.311474955170325	0.2811355859269	C1QA/C1QB	2
BP	membrane depolarization during cardiac muscle cell action potential	2/316	16/15514	0.0411205433774157	0.311474955170325	0.2811355859269	CACNA1G/SCN3B	2
BP	optic cup morphogenesis involved in camera-type eye development	2/316	16/15514	0.0411205433774157	0.311474955170325	0.2811355859269	ALDH1A1/PITX2	2
BP	positive regulation of type 2 immune response	2/316	16/15514	0.0411205433774157	0.311474955170325	0.2811355859269	CLCF1/RSAD2	2
BP	renal tubule morphogenesis	6/316	124/15514	0.0413541955456342	0.311499615303285	0.281157844027635	IRX1/IRX2/IRX3/MYH7B/WNK4/WNT4	6
BP	positive regulation of leukocyte mediated immunity	6/316	124/15514	0.0413541955456342	0.311499615303285	0.281157844027635	CLCF1/FCER2/ITGB2/POMC/PTAFR/RSAD2	6
BP	positive regulation of type I interferon production	4/316	64/15514	0.0413577892994221	0.311499615303285	0.281157844027635	IFIH1/STING1/TLR9/ZBP1	4
BP	heart valve development	4/316	64/15514	0.0413577892994221	0.311499615303285	0.281157844027635	CEMIP2/ELN/HEYL/PITX2	4
MF	CCR chemokine receptor binding	3/316	38/15514	0.0418019843301837	0.312195745523461	0.281786167345713	CCL1/CCL2/CCL21	3
MF	ligase activity, forming carbon-sulfur bonds	3/316	38/15514	0.0418019843301837	0.312195745523461	0.281786167345713	ACSS1/SLC27A6/UBA7	3
BP	protein serine/threonine/tyrosine kinase activity	3/316	38/15514	0.0418019843301837	0.312195745523461	0.281786167345713	MTMR8/PRKCB/PRKCG	3
BP	response to corticosterone	3/316	38/15514	0.0418019843301837	0.312195745523461	0.281786167345713	AANAT/BDH1/CCND1	3
BP	response to glucagon	3/316	38/15514	0.0418019843301837	0.312195745523461	0.281786167345713	ADCY1/ADCY7/GCGR	3
BP	skeletal muscle fiber development	3/316	38/15514	0.0418019843301837	0.312195745523461	0.281786167345713	ACTC1/KIF5C/RCAN1	3
BP	response to acid chemical	16/316	489/15514	0.042951100606147	0.319784267006923	0.28863552520951	AANAT/ALDH1A1/ARG2/CCL2/CCL21/ELN/FABP3/FOXO1/KRT8/MEST/PITX2/PON1/PTAFR/RUNX1/TBX1/ZNF683	16
BP	heart looping	5/316	94/15514	0.0429982225684426	0.319784267006923	0.28863552520951	CEMIP2/MICAL2/PITX2/TBX1/ZIC3	5
BP	positive regulation of small GTPase mediated signal transduction	5/316	94/15514	0.0429982225684426	0.319784267006923	0.28863552520951	ARHGEF2/FGF10/GPR4/PLEKHG5/RASGRP3	5
BP	monosaccharide metabolic process	8/316	192/15514	0.0431909246145903	0.320769419208777	0.289524718182808	ALDH1A1/ATF3/DCXR/FBN1/OAS1X/OAS1Y/OAS1Z/SLC25A1	8
BP	mitotic G1 DNA damage checkpoint	4/316	65/15514	0.0433906324993785	0.321803785597759	0.290458331611439	BTG2/CCND1/GTSE1/ZNF385A	4
BP	determination of left/right symmetry	8/316	193/15514	0.0442991438601101	0.327629084798731	0.295716214715297	CEMIP2/FGF10/MICAL2/MYO1G/PITX2/RFX2/TBX1/ZIC3	8
BP	cellular response to tumor necrosis factor	8/316	193/15514	0.0442991438601101	0.327629084798731	0.295716214715297	ARHGEF2/CCL1/CCL2/CCL21/CHI3L1/KRT8/TNFRSF25/TNFRSF6B	8
BP	developmental induction	3/316	39/15514	0.0446249819728253	0.328044678345876	0.296091327171193	FGF10/IRX1/WNT4	3
BP	positive regulation of neutrophil migration	3/316	39/15514	0.0446249819728253	0.328044678345876	0.296091327171193	CCL21/PAWR/THBS4	3
BP	lymphocyte chemotaxis	3/316	39/15514	0.0446249819728253	0.328044678345876	0.296091327171193	CCL1/CCL2/CCL21	3
BP	male genitalia morphogenesis	3/316	39/15514	0.0446249819728253	0.328044678345876	0.296091327171193	FGF10/ITGB2/MYO1G	3
BP	sarcomere organization	5/316	95/15514	0.0446633599625841	0.328044678345876	0.296091327171193	ITGA8/ITGB2/KRT8/MYH7B/XIRP1	5
BP	epithelium migration	11/316	301/15514	0.0448207115846808	0.328746954804994	0.296725198050823	CCN3/FGF10/GMFG/GPLD1/ITGA8/ITGB2/LGR6/LOXL2/MYH7B/PLEKHG5/PRSS2	11
BP	carboxylic acid transport	10/316	265/15514	0.0453781354213732	0.329600207915448	0.297495339627761	ANXA1/FABP3/SLC16A12/SLC16A13/SLC16A7/SLC16A9/SLC25A1/SLC27A6/SLC6A1/SLC7A8	10
BP	organic acid transport	10/316	265/15514	0.0453781354213732	0.329600207915448	0.297495339627761	ANXA1/FABP3/SLC16A12/SLC16A13/SLC16A7/SLC16A9/SLC25A1/SLC27A6/SLC6A1/SLC7A8	10
BP	regulation of cell cycle G1/S phase transition	8/316	194/15514	0.0454259531653038	0.329600207915448	0.297495339627761	ANXA1/BTG2/CCL2/CCND1/FGF10/GTSE1/PDPN/ZNF385A	8
BP	lamellipodium	8/316	194/15514	0.0454259531653038	0.329600207915448	0.297495339627761	ABLIM1/ACTC1/DPYSL3/GMFG/MYO1G/PDLIM4/PDPN/PLEKHG5	8
BP	G1 DNA damage checkpoint	4/316	66/15514	0.0454787983360368	0.329600207915448	0.297495339627761	BTG2/CCND1/GTSE1/ZNF385A	4
BP	regulation of interleukin-8 production	4/316	66/15514	0.0454787983360368	0.329600207915448	0.297495339627761	AFAP1L2/ANXA1/BPI/TLR9	4
BP	neutrophil chemotaxis	4/316	66/15514	0.0454787983360368	0.329600207915448	0.297495339627761	CCL1/CCL2/CCL21/ITGB2	4
BP	regulation of transforming growth factor beta receptor signaling pathway	6/316	127/15514	0.0455651003553281	0.329600207915448	0.297495339627761	ASPN/FBN1/FBN2/HTRA4/ITGA8/NEPN	6
BP	negative regulation of peptide secretion	7/316	160/15514	0.0456070373543564	0.329600207915448	0.297495339627761	ANXA1/ARG2/BANK1/CCN3/CRHR2/LGR6/RSAD2	7
BP	semicircular canal development	2/316	17/15514	0.0459892872265123	0.329600207915448	0.297495339627761	FGF10/TBX1	2
CC	anchored component of external side of plasma membrane	2/316	17/15514	0.0459892872265123	0.329600207915448	0.297495339627761	CA4/PRND	2
CC	invadopodium	2/316	17/15514	0.0459892872265123	0.329600207915448	0.297495339627761	ITGB2/PDPN	2
MF	guanylate cyclase activity	2/316	17/15514	0.0459892872265123	0.329600207915448	0.297495339627761	ADCY1/ADCY7	2
MF	oxidoreductase activity, acting on the CH-NH2 group of donors, oxygen as acceptor	2/316	17/15514	0.0459892872265123	0.329600207915448	0.297495339627761	LOXL1/LOXL2	2
BP	guanylate cyclase complex, soluble	2/316	17/15514	0.0459892872265123	0.329600207915448	0.297495339627761	ADCY1/ADCY7	2
BP	neural plate development	2/316	17/15514	0.0459892872265123	0.329600207915448	0.297495339627761	IRX2/IRX3	2
BP	pattern recognition receptor activity	2/316	17/15514	0.0459892872265123	0.329600207915448	0.297495339627761	PTAFR/TLR9	2
MF	receptor ligand activity	12/316	340/15514	0.0463340244801035	0.331624570371709	0.299322518076051	CCL1/CCL2/CCL21/CCN3/CLCF1/CRHR2/FBN1/FGF10/INHA/POMC/SEMA3A/WNT4	12
BP	response to ketone	12/316	341/15514	0.0471875262643181	0.337279969607375	0.304427050403217	AANAT/ADCY1/ARG2/BDH1/CACNA1G/CCL2/CCL21/CCND1/ELN/FOSL2/FOXO1/PTAFR	12
BP	negative regulation of alpha-beta T cell activation	3/316	40/15514	0.0475403892470715	0.338569174064317	0.305590679274064	ANXA1/ARG2/RUNX1	3
BP	negative regulation of toll-like receptor signaling pathway	3/316	40/15514	0.0475403892470715	0.338569174064317	0.305590679274064	LGR6/RAB7B/TLR9	3
BP	cardiac muscle cell development	4/316	67/15514	0.0476222180984364	0.338569174064317	0.305590679274064	ACTC1/FHL2/PITX2/XIRP1	4
CC	sarcoplasm	4/316	67/15514	0.0476222180984364	0.338569174064317	0.305590679274064	CA4/FABP3/RASD1/THBS4	4
BP	regulation of leukocyte mediated immunity	8/316	196/15514	0.0477356907921505	0.338923404624269	0.305910405834329	CLCF1/FCER2/ITGB2/POMC/PTAFR/RIPK3/RSAD2/TLR9	8
BP	cellular response to monosaccharide stimulus	5/316	97/15514	0.0481081008365326	0.341112699007372	0.307886450935045	AQP4/CCL2/ELN/MLXIPL/NPTX1	5
BP	negative regulation of leukocyte cell-cell adhesion	6/316	129/15514	0.0485154765597112	0.342632510186289	0.309258224168144	ANXA1/ARG2/BOLA-DQA5/CCL21/PAWR/RUNX1	6
BP	regulation of cellular response to transforming growth factor beta stimulus	6/316	129/15514	0.0485154765597112	0.342632510186289	0.309258224168144	ASPN/FBN1/FBN2/HTRA4/ITGA8/NEPN	6
BP	leukocyte chemotaxis	6/316	129/15514	0.0485154765597112	0.342632510186289	0.309258224168144	ANXA1/CCL1/CCL2/CCL21/CXCR4/ITGB2	6
MF	GTPase activator activity	9/316	233/15514	0.0495689331351298	0.347885651464091	0.313999680669145	ALDH1A1/ARHGAP15/ARHGAP30/RASGRP3/RGS1/RGS14/RGSL1/SRGAP1/TBC1D1	9
BP	basal plasma membrane	4/316	68/15514	0.0498207883031711	0.347885651464091	0.313999680669145	ABLIM1/AQP4/ITGA8/ITGB2	4
BP	cranial nerve development	4/316	68/15514	0.0498207883031711	0.347885651464091	0.313999680669145	HOXB2/HOXB3/SEMA3A/TBX1	4
BP	mitotic G1/S transition checkpoint	4/316	68/15514	0.0498207883031711	0.347885651464091	0.313999680669145	BTG2/CCND1/GTSE1/ZNF385A	4
BP	extracellular exosome	5/316	98/15514	0.0498878346093466	0.347885651464091	0.313999680669145	ANXA1/CA4/ITGA2B/ITM2C/WNT4	5
KEGG	Influenza A	11/294	161/15545	0.000248319780098664	0.0483776334735715	0.0392017367571344	BOLA-DOB/BOLA-DQA5/CCL2/IFIH1/MX1/OAS1X/OAS1Y/OAS1Z/PRKCB/PRSS2/RSAD2	11
KEGG	Oxytocin signaling pathway	10/294	149/15545	0.000543343529488269	0.0483776334735715	0.0392017367571344	ADCY1/ADCY7/CACNA2D2/CCND1/MYL6B/PLA2G4E/PRKAG3/PRKCB/PRKCG/RCAN1	10
KEGG	Motor proteins	11/294	186/15545	0.000841631034029961	0.0483776334735715	0.0392017367571344	ACTC1/DYNC1I1/KIF26A/KIF5C/MYH1/MYH15/MYH7B/MYL4/MYL6B/MYO1B/MYO1G	11
KEGG	Viral myocarditis	6/294	59/15545	0.000844737235527942	0.0483776334735715	0.0392017367571344	BOLA-DOB/BOLA-DQA5/CCND1/ITGB2/JSP.1/PRF1	6
KEGG	Measles	9/294	132/15545	0.000912785537237198	0.0483776334735715	0.0392017367571344	CCND1/CD3E/IFIH1/IL2RB/MX1/OAS1X/OAS1Y/OAS1Z/TLR9	9
KEGG	Coronavirus disease - COVID-19	12/294	223/15545	0.00113240076545699	0.0490256566054194	0.039726847855037	C1QA/C1QB/CCL2/IFIH1/ISG15/MX1/OAS1X/OAS1Y/OAS1Z/PRKCB/PRKCG/STING1	12
KEGG	ECM-receptor interaction	7/294	87/15545	0.0012950173442941	0.0490256566054194	0.039726847855037	FREM1/FREM2/GP5/ITGA2B/ITGA8/THBS3/THBS4	7
KEGG	Glycosaminoglycan binding proteins	11/294	205/15545	0.00184300638115461	0.0519235752770182	0.0420751116445351	CCL2/CEMIP2/FBN1/FBN2/FGF10/HAPLN2/LPL/TFPI/THBS3/THBS4/WNT4	11
KEGG	Hematopoietic cell lineage	7/294	93/15545	0.00190772915408675	0.0519235752770182	0.0420751116445351	BOLA-DOB/BOLA-DQA5/CD37/CD3E/FCER2/GP5/ITGA2B	7
KEGG	Malaria	5/294	48/15545	0.00205914171512158	0.0519235752770182	0.0420751116445351	CCL2/ITGB2/THBS3/THBS4/TLR9	5
KEGG	Aldosterone synthesis and secretion	7/294	95/15545	0.00215531821904604	0.0519235752770182	0.0420751116445351	ADCY1/ADCY7/CACNA1G/CREB3L1/POMC/PRKCB/PRKCG	7
KEGG	Cushing syndrome	9/294	153/15545	0.00254403508288013	0.0561807747469362	0.0455248383252234	ADCY1/ADCY7/CACNA1G/CCND1/CREB3L1/CRHR2/POMC/RASD1/WNT4	9
KEGG	Melanogenesis	7/294	100/15545	0.00288316452059985	0.058772199842997	0.0476247418787344	ADCY1/ADCY7/CREB3L1/POMC/PRKCB/PRKCG/WNT4	7
KEGG	Epstein-Barr virus infection	10/294	197/15545	0.00434956800589742	0.0759460347241044	0.0615411761021541	BOLA-DOB/BOLA-DQA5/CCND1/CD3E/FCER2/ISG15/JSP.1/OAS1X/OAS1Y/OAS1Z	10
KEGG	Insulin resistance	7/294	108/15545	0.00442213972799714	0.0759460347241044	0.0615411761021541	CREB3L1/FOXO1/MLXIP/MLXIPL/PRKAG3/PRKCB/SLC27A6	7
KEGG	Allograft rejection	4/294	36/15545	0.00458542096447423	0.0759460347241044	0.0615411761021541	BOLA-DOB/BOLA-DQA5/JSP.1/PRF1	4
KEGG	Viral protein interaction with cytokine and cytokine receptor	6/294	85/15545	0.00545464909988868	0.0822789696017233	0.0666729286941472	ACKR4/CCL1/CCL2/CCL21/CXCR4/IL2RB	6
KEGG	Graft-versus-host disease	4/294	39/15545	0.00612592857914387	0.0822789696017233	0.0666729286941472	BOLA-DOB/BOLA-DQA5/JSP.1/PRF1	4
KEGG	Staphylococcus aureus infection	6/294	88/15545	0.00645007042623098	0.0822789696017233	0.0666729286941472	BOLA-DOB/BOLA-DQA5/C1QA/C1QB/ITGB2/PTAFR	6
KEGG	Cortisol synthesis and secretion	5/294	63/15545	0.00672152744108567	0.0822789696017233	0.0666729286941472	ADCY1/ADCY7/CACNA1G/CREB3L1/POMC	5
KEGG	Phagosome	8/294	148/15545	0.00717417220555551	0.0822789696017233	0.0666729286941472	BOLA-DOB/BOLA-DQA5/DYNC1I1/ITGB2/JSP.1/RAB7B/THBS3/THBS4	8
KEGG	Signaling proteins	12/294	280/15545	0.00719048422625051	0.0822789696017233	0.0666729286941472	ANGPTL2/APOL3/IFI27/IFI6/MGP/MYMK/NPTX1/OLFML2B/OTOR/PRUNE2/PTX3/RGS1	12
KEGG	AMPK signaling pathway	7/294	120/15545	0.00779991872351222	0.0822789696017233	0.0666729286941472	CCND1/CREB3L1/FOXO1/PFKFB3/PRKAG3/SCD5/TBC1D1	7
KEGG	Type I diabetes mellitus	4/294	42/15545	0.00797663579536774	0.0822789696017233	0.0666729286941472	BOLA-DOB/BOLA-DQA5/JSP.1/PRF1	4
KEGG	Human cytomegalovirus infection	10/294	216/15545	0.00817493227246057	0.0822789696017233	0.0666729286941472	ADCY1/ADCY7/CCL2/CCND1/CREB3L1/CXCR4/JSP.1/PRKCB/PRKCG/STING1	10
KEGG	Dilated cardiomyopathy	6/294	93/15545	0.00839290145420172	0.0822789696017233	0.0666729286941472	ACTC1/ADCY1/ADCY7/CACNA2D2/ITGA2B/ITGA8	6
KEGG	Enzymes with EC numbers	10/294	217/15545	0.00843121203951306	0.0822789696017233	0.0666729286941472	GK5/GLT1D1/HPDL/LOXL1/LOXL2/MAB21L1/PADI2/PARP10/PARP12/SULF2	10
KEGG	Human T-cell leukemia virus 1 infection	10/294	218/15545	0.00869362697678585	0.0822789696017233	0.0666729286941472	ADCY1/ADCY7/BOLA-DOB/BOLA-DQA5/CCND1/CD3E/CREB3L1/IL2RB/ITGB2/JSP.1	10
KEGG	Amoebiasis	6/294	96/15545	0.00974249795447867	0.0874058605285315	0.0708273904580752	ADCY1/ARG2/ITGB2/PRKCB/PRKCG/RAB7B	6
KEGG	Autoimmune thyroid disease	4/294	45/15545	0.0101607722163662	0.0874058605285315	0.0708273904580752	BOLA-DOB/BOLA-DQA5/JSP.1/PRF1	4
KEGG	Circadian entrainment	6/294	97/15545	0.0102248365146584	0.0874058605285315	0.0708273904580752	ADCY1/ADCY7/CACNA1G/PRKCB/PRKCG/RASD1	6
KEGG	Chagas disease	6/294	101/15545	0.012324441672974	0.102061782604316	0.0827034901739047	ADCY1/C1QA/C1QB/CCL2/CD3E/TLR9	6
KEGG	Thyroid hormone synthesis	5/294	74/15545	0.0130358542892293	0.104681860201387	0.0848266116428316	ADCY1/ADCY7/CREB3L1/PRKCB/PRKCG	5
KEGG	Gastric acid secretion	5/294	75/15545	0.0137572563976955	0.107225674864391	0.0868879351433398	ADCY1/ADCY7/HRH2/PRKCB/PRKCG	5
KEGG	Wnt signaling pathway	8/294	167/15545	0.0142260708030922	0.107711678937698	0.0872817577091973	CCND1/LGR6/NOTUM/PRKCB/PRKCG/RNF43/SFRP4/WNT4	8
KEGG	PPAR signaling pathway	5/294	78/15545	0.0160814560792087	0.118377385027508	0.0959244748584376	FABP3/LPL/PLTP/SCD5/SLC27A6	5
KEGG	Rap1 signaling pathway	9/294	209/15545	0.0181638444059567	0.130092399123744	0.105417475357473	ADCY1/ADCY7/FGF10/ITGA2B/ITGB2/PRKCB/PRKCG/RASGRP3/RGS14	9
KEGG	Human papillomavirus infection	12/294	321/15545	0.0194576490241915	0.135691499773967	0.109954581743353	CCND1/CREB3L1/FOXO1/HEYL/ISG15/ITGA2B/ITGA8/JSP.1/MX1/THBS3/THBS4/WNT4	12
KEGG	Glutamatergic synapse	6/294	113/15545	0.0204092118755615	0.138677978128816	0.112374607897829	ADCY1/ADCY7/GRK3/PLA2G4E/PRKCB/PRKCG	6
KEGG	Chemokine signaling pathway	8/294	181/15545	0.0219677446469501	0.145327384914441	0.117762806445069	ADCY1/ADCY7/CCL1/CCL2/CCL21/CXCR4/GRK3/PRKCB	8
KEGG	Insulin secretion	5/294	85/15545	0.0224846142697815	0.145327384914441	0.117762806445069	ADCY1/ADCY7/CREB3L1/PRKCB/PRKCG	5
KEGG	Platelet activation	6/294	120/15545	0.0264913925975496	0.154348422125654	0.125072802834691	ADCY1/ADCY7/FERMT3/GP5/ITGA2B/PLA2G4E	6
KEGG	Thyroid hormone signaling pathway	6/294	120/15545	0.0264913925975496	0.154348422125654	0.125072802834691	CCND1/FOXO1/PRKCB/PRKCG/RCAN1/WNT4	6
KEGG	Longevity regulating pathway - multiple species	4/294	60/15545	0.026721579834409	0.154348422125654	0.125072802834691	ADCY1/ADCY7/FOXO1/PRKAG3	4
KEGG	GABAergic synapse	5/294	89/15545	0.0267925562935097	0.154348422125654	0.125072802834691	ADCY1/ADCY7/PRKCB/PRKCG/SLC6A1	5
KEGG	Longevity regulating pathway	5/294	89/15545	0.0267925562935097	0.154348422125654	0.125072802834691	ADCY1/ADCY7/CREB3L1/FOXO1/PRKAG3	5
KEGG	Hypertrophic cardiomyopathy	5/294	90/15545	0.0279460552681931	0.157568183958961	0.127681865055126	ACTC1/CACNA2D2/ITGA2B/ITGA8/PRKAG3	5
KEGG	Morphine addiction	5/294	91/15545	0.0291306323152121	0.1608253659069	0.130321249831212	ADCY1/ADCY7/GRK3/PRKCB/PRKCG	5
KEGG	African trypanosomiasis	3/294	36/15545	0.0301973612858942	0.163312260015551	0.132336449029483	PRKCB/PRKCG/TLR9	3
KEGG	Pancreatic secretion	5/294	93/15545	0.0315938654583563	0.167447486929288	0.13568733796852	ADCY1/ADCY7/PRKCB/PRKCG/PRSS2	5
KEGG	Chemical carcinogenesis - receptor activation	8/294	200/15545	0.0366809658973884	0.190597175741332	0.15444617219953	ADCY1/ADCY7/CCND1/CREB3L1/EPHX2/FGF10/PRKCB/PRKCG	8
KEGG	Arachidonic acid metabolism	4/294	67/15545	0.0379572514999598	0.193435993220949	0.156746544655704	DCXR/EPHX2/PLA2G4E/PTGDS	4
KEGG	Cytokine-cytokine receptor interaction	10/294	279/15545	0.0399564747130819	0.19978237356541	0.161889	ACKR4/CCL1/CCL2/CCL21/CLCF1/CXCR4/IL2RB/INHA/TNFRSF25/TNFRSF6B	10
KEGG	Alcoholic liver disease	6/294	133/15545	0.0407426470133407	0.199940767750653	0.162017543678782	C1QA/C1QB/CCND1/FOXO1/PRKAG3/SCD5	6
KEGG	Vascular smooth muscle contraction	6/294	134/15545	0.0420057215547439	0.202391203854675	0.164003199945794	ADCY1/ADCY7/MYL6B/PLA2G4E/PRKCB/PRKCG	6
KEGG	Non-small cell lung cancer	4/294	72/15545	0.0474081998670916	0.214785160901644	0.174046366728641	CCND1/KIF5C/PRKCB/PRKCG	4
KEGG	Vasopressin-regulated water reabsorption	3/294	43/15545	0.0474369171058854	0.214785160901644	0.174046366728641	AQP4/CREB3L1/DYNC1I1	3
KEGG	Inflammatory mediator regulation of TRP channels	5/294	104/15545	0.0474384776349543	0.214785160901644	0.174046366728641	ADCY1/ADCY7/PLA2G4E/PRKCB/PRKCG	5
KEGG	Calcium signaling pathway	9/294	250/15545	0.0486517802801822	0.214785160901644	0.174046366728641	ADCY1/ADCY7/CACNA1G/CXCR4/FGF10/HRH2/PRKCB/PRKCG/PTAFR	9
KEGG	Parathyroid hormone synthesis and secretion and action	5/294	105/15545	0.04907489211103	0.214785160901644	0.174046366728641	ADCY1/ADCY7/CREB3L1/PRKCB/PRKCG	5
KEGG	Leishmaniasis	4/294	73/15545	0.0494411125094349	0.214785160901644	0.174046366728641	BOLA-DOB/BOLA-DQA5/ITGB2/PRKCB	4

## Sheet: Table S6
Table S6 Metabolomics analysis enriched KEGG pathways
ONTOLOGY	Description	GeneRatio	BgRatio	pvalue	p.adjust	qvalue	geneID	Count
KEGG	Purine metabolism	13/70	101/3549	4.56659847289447e-08	7.12389361771537e-06	5.33570979464512e-06	C03794/C00131/C00362/C00301/C00575/C00144/C00064/C00048/C03090/C04751/C00620/C00294/C00212	13
KEGG	Central carbon metabolism in cancer	8/70	37/3549	3.73308583204247e-07	2.91180694899312e-05	2.18090803871955e-05	C00082/C00085/C00158/C00064/C00123/C00149/C00074/C00311	8
KEGG	Glucagon signaling pathway	6/70	26/3549	7.99702115389871e-06	0.000415845100002733	0.000311462929151845	C00085/C00575/C00158/C00149/C00074/C00311	6
KEGG	Retrograde endocannabinoid signaling	5/70	19/3549	2.42524859818732e-05	0.000945846953293055	0.000708427879996822	C00157/C00350/C13856/C00575/C00689	5
KEGG	Protein digestion and absorption	6/70	47/3549	0.000269025339526077	0.00839359059321359	0.00628669740787253	C00082/C00064/C00463/C00123/C00188/C01746	6
KEGG	Taste transduction	5/70	33/3549	0.000399389375960211	0.0103841237749655	0.00777758258448832	C02265/C00575/C00144/C00158/C00149	5
KEGG	Citrate cycle (TCA cycle)	4/70	20/3549	0.000529886399794478	0.0113273133907458	0.00848402015096343	C00158/C00149/C00074/C00311	4
KEGG	Pentose phosphate pathway	5/70	37/3549	0.000689990295576845	0.0113273133907458	0.00848402015096343	C00279/C00085/C01182/C00620/C00121	5
KEGG	Caffeine metabolism	4/70	22/3549	0.000776532054378939	0.0113273133907458	0.00848402015096343	C16357/C16353/C00048/C16365	4
KEGG	Alcoholism	3/70	10/3549	0.000798720816014125	0.0113273133907458	0.00848402015096343	C00082/C00575/C00212	3
KEGG	cGMP-PKG signaling pathway	3/70	10/3549	0.000798720816014125	0.0113273133907458	0.00848402015096343	C00575/C00144/C00212	3
KEGG	Glyoxylate and dicarboxylate metabolism	6/70	64/3549	0.00144291782029687	0.0187579316638593	0.0140494629871011	C00158/C00064/C00048/C00149/C01182/C00311	6
KEGG	Alanine	4/70	29/3549	0.0022720385462238	0.0272644625546856	0.020420751306141	C03794/C00158/C00064/C03090	4
KEGG	Neuroactive ligand-receptor interaction	5/70	53/3549	0.00355868713423988	0.0396539423529587	0.0297003211955359	C13856/C01120/C06124/C00245/C00212	5
KEGG	Proximal tubule bicarbonate reclamation	3/70	17/3549	0.00409885943938855	0.0426281381696409	0.031927957738395	C00064/C00149/C00074	3
KEGG	Phenylalanine	4/70	36/3549	0.0050795298211417	0.0486338252242255	0.0364261443987114	C00279/C00082/C00463/C00074	4
KEGG	Melanogenesis	2/70	6/3549	0.00546576384416352	0.0486338252242255	0.0364261443987114	C00082/C00575	2
KEGG	Starch and sucrose metabolism	4/70	37/3549	0.00561159521817986	0.0486338252242255	0.0364261443987114	C00085/C00029/C01231/C00689	4
KEGG	Thermogenesis	3/70	23/3549	0.00980969580095294	0.0705210130042588	0.0528193822096675	C13856/C00575/C01352	3
KEGG	Cocaine addiction	2/70	8/3549	0.00994527106470317	0.0705210130042588	0.0528193822096675	C00082/C00575	2
KEGG	Glutamatergic synapse	2/70	8/3549	0.00994527106470317	0.0705210130042588	0.0528193822096675	C00575/C00064	2
KEGG	Olfactory transduction	2/70	8/3549	0.00994527106470317	0.0705210130042588	0.0528193822096675	C00575/C00144	2
KEGG	Apelin signaling pathway	2/70	9/3549	0.0126247470561265	0.0820608558648222	0.0614625843521947	C06124/C00575	2
KEGG	GABAergic synapse	2/70	9/3549	0.0126247470561265	0.0820608558648222	0.0614625843521947	C00575/C00064	2
KEGG	Parkinson disease	3/70	26/3549	0.0138076498407777	0.0861597350064532	0.0645325950453192	C00082/C00575/C00212	3
KEGG	Amphetamine addiction	2/70	10/3549	0.0155812536161546	0.0934875216969275	0.0700210182750267	C00082/C00575	2
KEGG	Aminoacyl-tRNA biosynthesis	4/70	52/3549	0.0184414089047975	0.0946222591418788	0.070870922839059	C00082/C00064/C00123/C00188	4
KEGG	ABC transporters	7/70	139/3549	0.0185563419495461	0.0946222591418788	0.070870922839059	C00064/C00123/C00188/C00245/C00294/C00121/C00212	7
KEGG	Mineral absorption	3/70	29/3549	0.0186067559617003	0.0946222591418788	0.070870922839059	C00064/C00123/C00188	3
KEGG	Calcium signaling pathway	2/70	11/3549	0.0188031412397323	0.0946222591418788	0.070870922839059	C06124/C00575	2
KEGG	Phospholipase D signaling pathway	2/70	11/3549	0.0188031412397323	0.0946222591418788	0.070870922839059	C06124/C00575	2
KEGG	Hedgehog signaling pathway	1/70	1/3549	0.0197238658777125	0.0961538461538483	0.0720180629087528	C00575	1
KEGG	Pathways in cancer	3/70	31/3549	0.0222584539722351	0.0965427702986432	0.0723093623694291	C00535/C00575/C00149	3
KEGG	Dopaminergic synapse	2/70	12/3549	0.0222791008381484	0.0965427702986432	0.0723093623694291	C00082/C00575	2
KEGG	Morphine addiction	2/70	12/3549	0.0222791008381484	0.0965427702986432	0.0723093623694291	C00575/C00212	2
KEGG	Parathyroid hormone synthesis	2/70	12/3549	0.0222791008381484	0.0965427702986432	0.0723093623694291	C01561/C00575	2
KEGG	Sulfur metabolism	3/70	34/3549	0.0284178517561146	0.119815807404159	0.0897405844929934	C00979/C00263/C00245	3
KEGG	Regulation of lipolysis in adipocytes	2/70	14/3549	0.0299496503590808	0.122951196210963	0.0920889526276444	C00575/C00212	2
KEGG	Sphingolipid signaling pathway	2/70	15/3549	0.0341232478869649	0.13649299154786	0.102231592859733	C06124/C00212	2
KEGG	Vascular smooth muscle contraction	2/70	16/3549	0.0385089164025016	0.141721103678053	0.10614738534591	C00575/C00212	2
KEGG	Circadian rhythm	1/70	2/3549	0.0390641503727966	0.141721103678053	0.10614738534591	C00575	1
KEGG	Longevity regulating pathway - multiple species	1/70	2/3549	0.0390641503727966	0.141721103678053	0.10614738534591	C00575	1
KEGG	Vasopressin-regulated water reabsorption	1/70	2/3549	0.0390641503727966	0.141721103678053	0.10614738534591	C00575	1
KEGG	Renin secretion	2/70	17/3549	0.0430969239975834	0.152798185082341	0.114443984778272	C00575/C00212	2
KEGG	Tuberculosis	2/70	18/3549	0.0478778305529906	0.165976479250367	0.12431436704987	C01561/C06124	2
