# Supplementary material
Source: Research Square preprint supplement (doi:10.21203/rs.3.rs-8747903/v1)
Supplement: Supplementary file 2 [file b30e5690ff06710bee949ceb.docx]

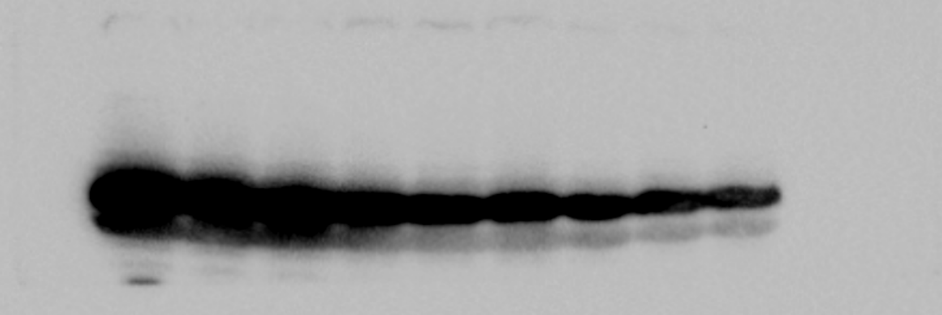


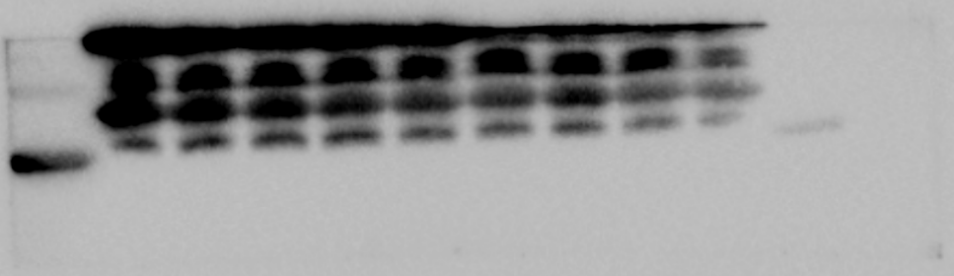


10 kDa

FABP3 15 kDa

17 kDa

52 kDa

Fig4-LPL1-1

17 kDa

10 kDa

Fig4-FABP3-3

Fig4-FABP3-2

Fig4-FABP3-1


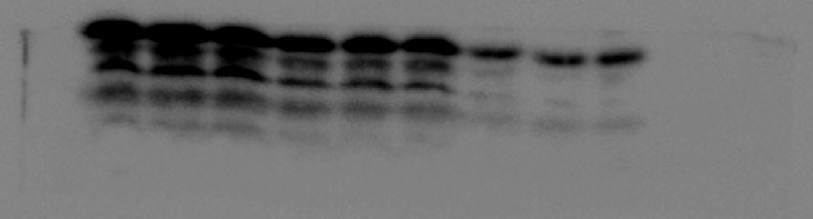


10 kDa

FABP3 15 kDa


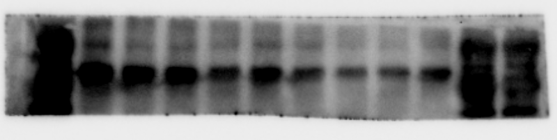


LPL1 53 kDa

65 kDa

Fig4-LPL1-2


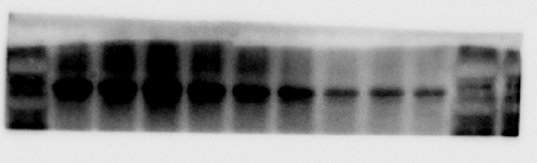


LPL1 53 kDa


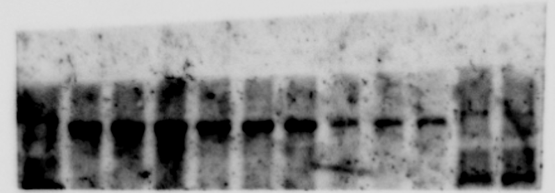


LPL1 53 kDa

Fig4-LPL1-3

Fig4-GADPH-1


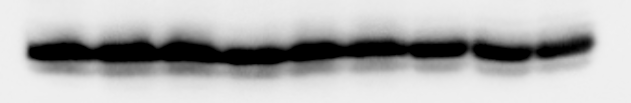


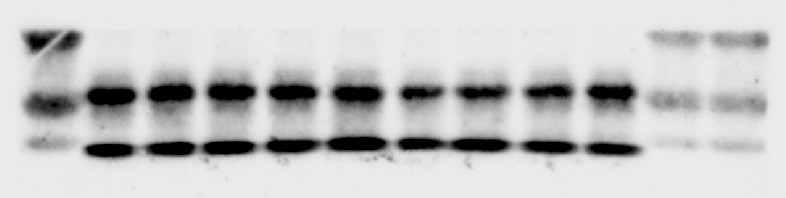


41 kDa

GAPDH 39 kDa

GAPDH 39 kDa

Fig4-GADPH-2

Fig4-GADPH-3


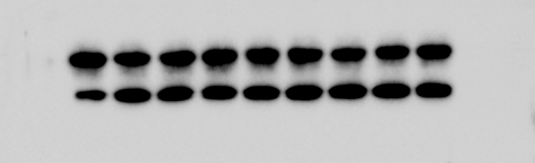


41 kDa

GAPDH 39 kDa


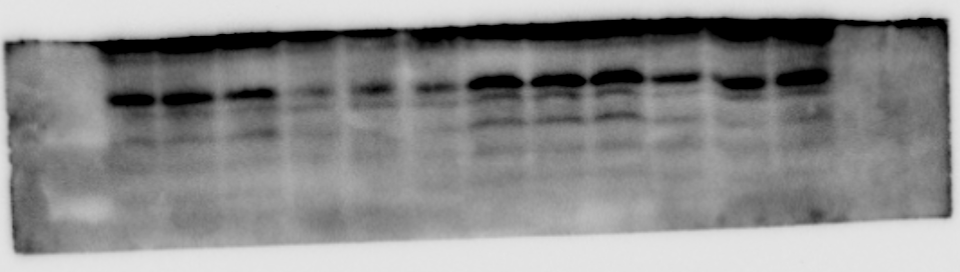


Fig7-FABP3

Piperidine

1.2μm-6D

Control-6D

Piperidine

1.2μm-3D

Control-3D

FABP3

Fig7-FABP3

Control-3D

Piperidine

1.2μm-3D

Control-6D

Piperidine

1.2μm-6D


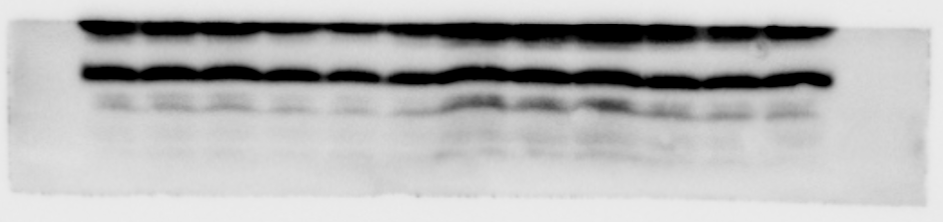


FABP3

Fig7-FABP3

Control-3D

Piperidine

1.2μm-3D

Control-6D

Piperidine

1.2μm-6D


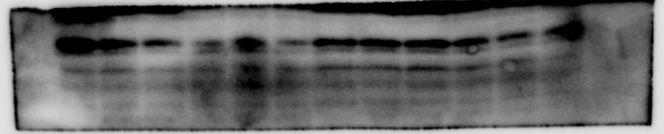


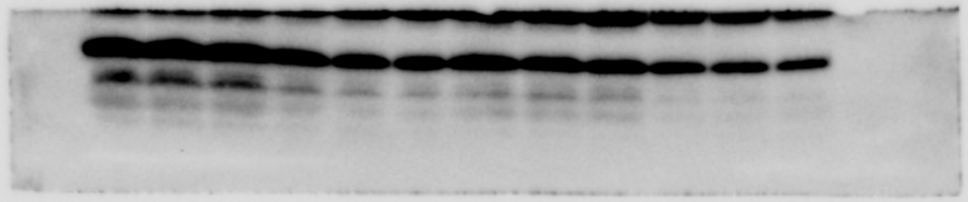


FABP3

Control-9D

Piperidine

1.2μm-9D

Control-9D

Piperidine

1.2μm-9D

FABP3

Fig7-FABP3


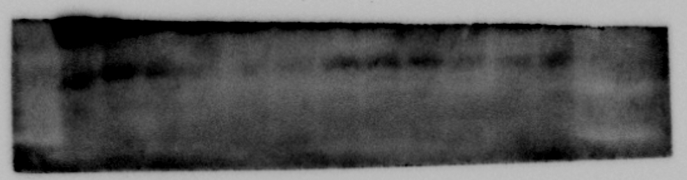


Fig7-FABP3

Piperidine

1.2μm-9D

Control-9D

Piperidine

1.2μm-9D

Control-9D

FABP3

Fig7-GAPDH


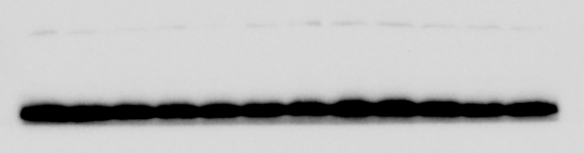


GAPDH

Fig7-GAPDH


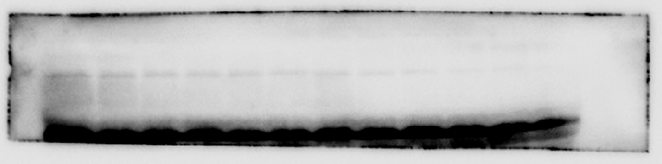


GAPDH

Fig7-GAPDH


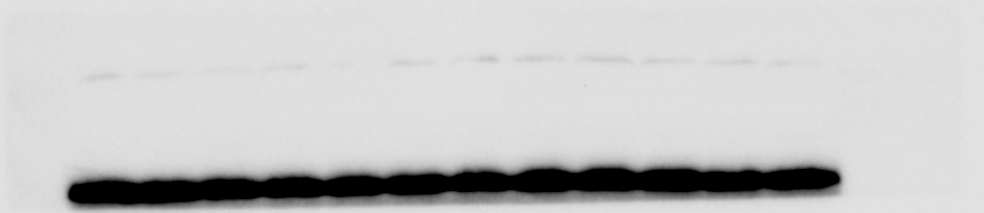


GAPDH
